# Supplementary material for: Would integrated Western and traditional Chinese medicine have more benefits for stroke rehabilitation? A systematic review and meta-analysis
Source: PubMed Central journal article supplement — Stroke Vasc Neurol. 2021 Aug 26;7(1):77–85. doi: 10.1136/svn-2020-000781 (PMC8899656; doi:10.1136/svn-2020-000781), 2021-08-26
Supplement: svn-2020-000781supp001.pdf [file svn-2020-000781supp001.pdf]

# **Supplementary Material**

## **Would Integrated Western and Traditional Chinese Medicine Have More Benefits for Stroke Rehabilitation? – A Systematic Review and Meta-analysis**

## Supplementary Figures

**Supplementary Figure 1. Improvement of dependency (BI, MBI, ADL)**

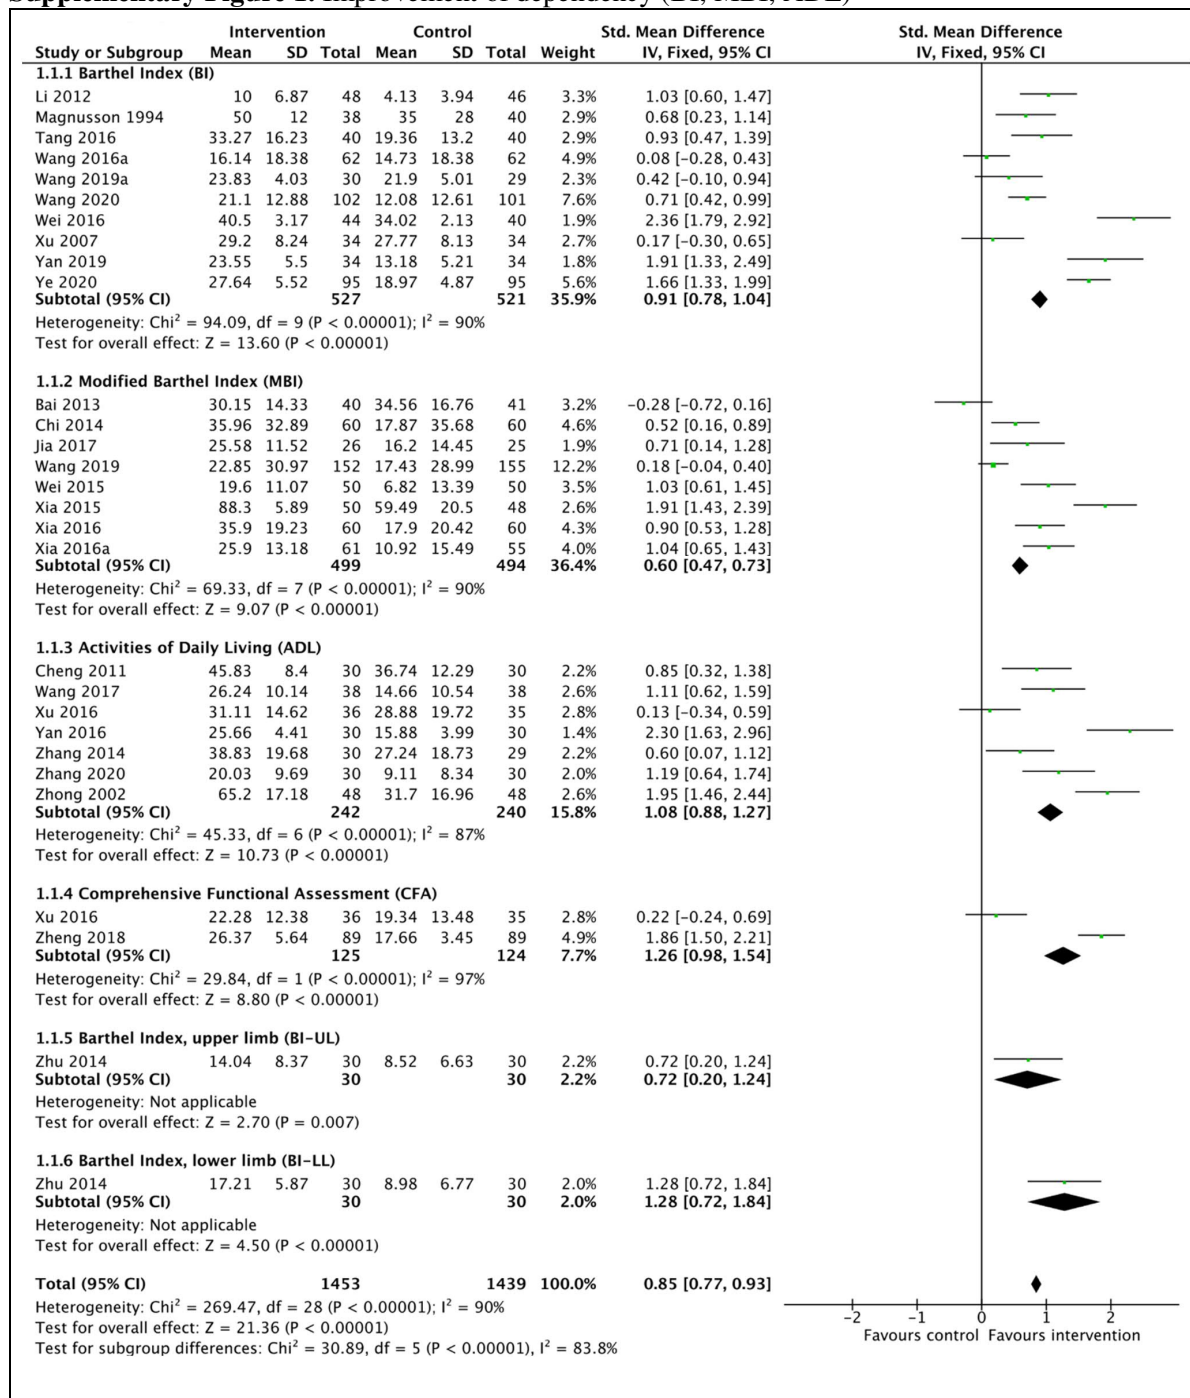

\* The reference for each study have been listed in Table 2 and 'List of included studies' references'.

Supplementary Figure 2. Improvement of motor function (FMA, MASc, MEP, Brunn)

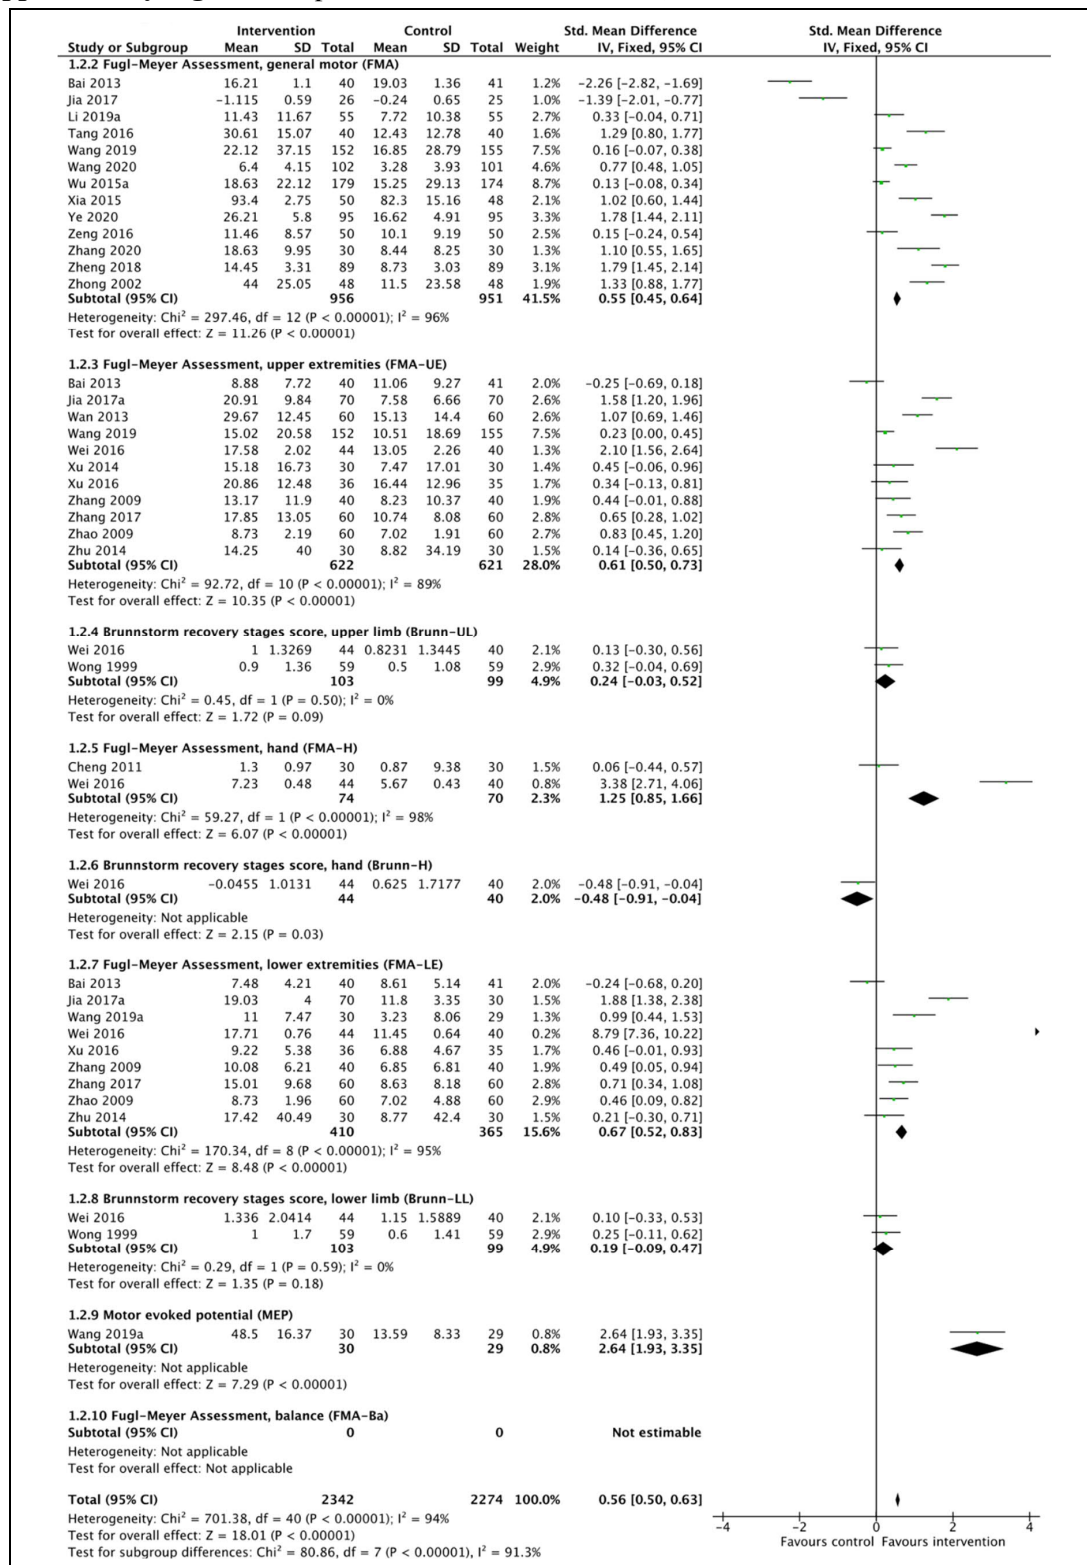

\* The reference for each study have been listed in Table 2 and 'List of included studies' references'.

**Supplementary Figure 3. Improvement of depression (HAMA, HAMD, TCM, CES)**

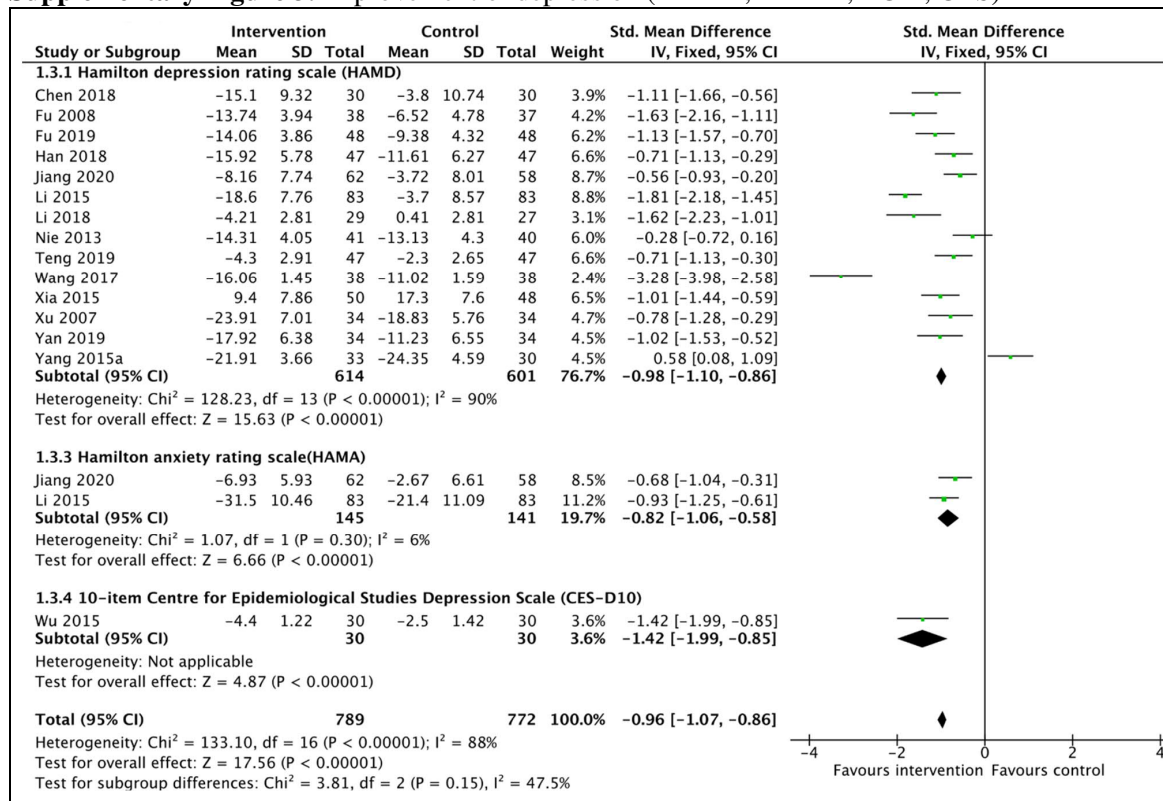

\* The reference for each study have been listed in Table 2 and 'List of included studies' references'.

## Supplementary Figure 4. Improvement of swallowing function (WDT)

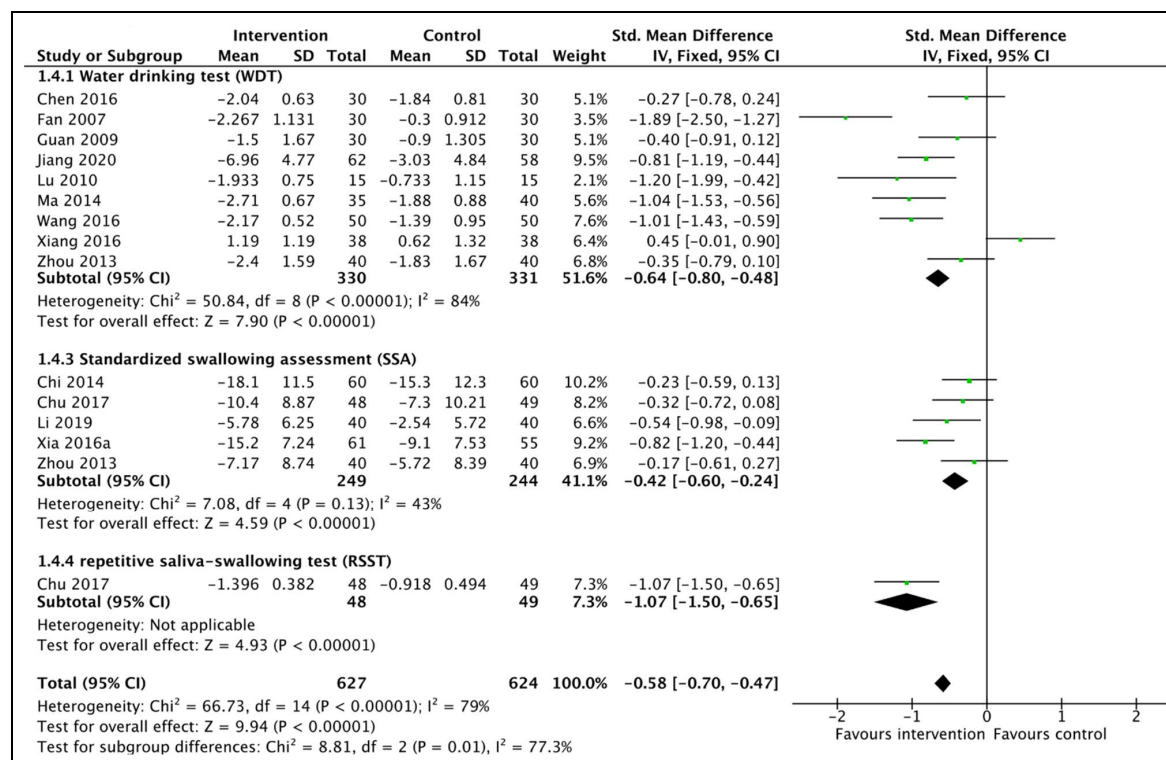

\* The reference for each study have been listed in Table 2 and 'List of included studies' references'.

**Supplementary Figure 5.** Funnel plot for outcome: Improvement of dependency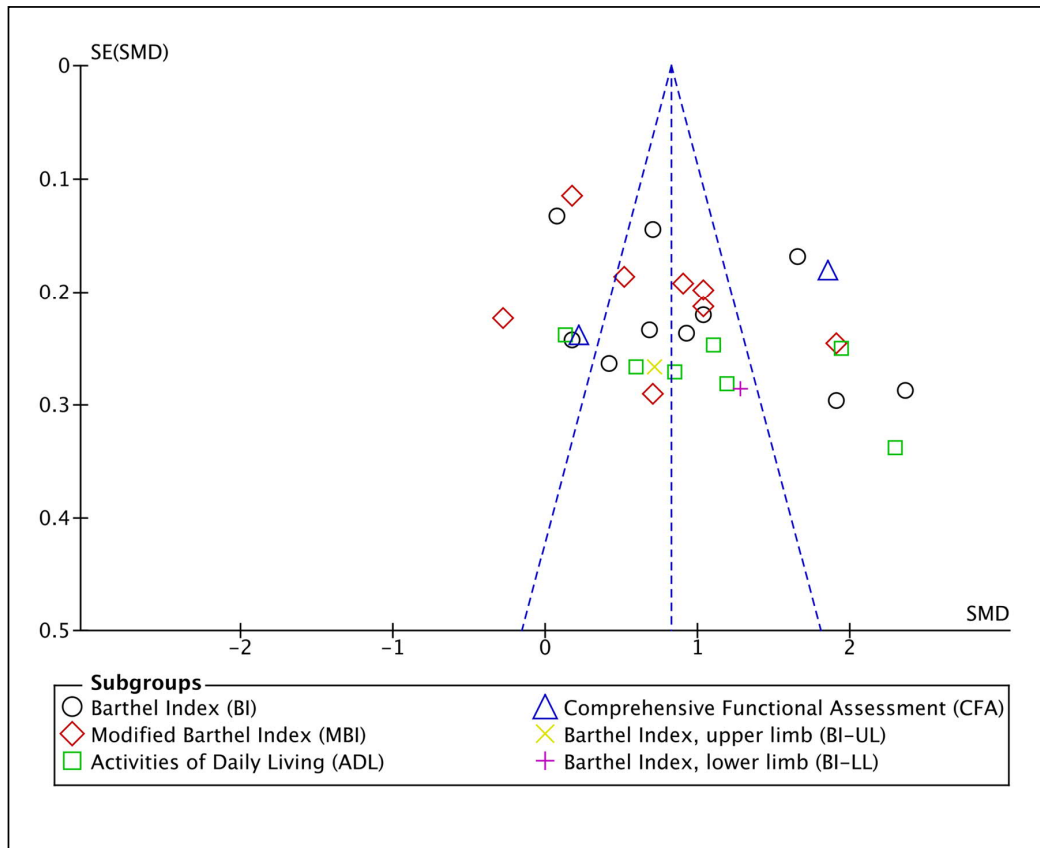

**Supplementary Figure 6.** Funnel plot for outcome: Improvement of motor function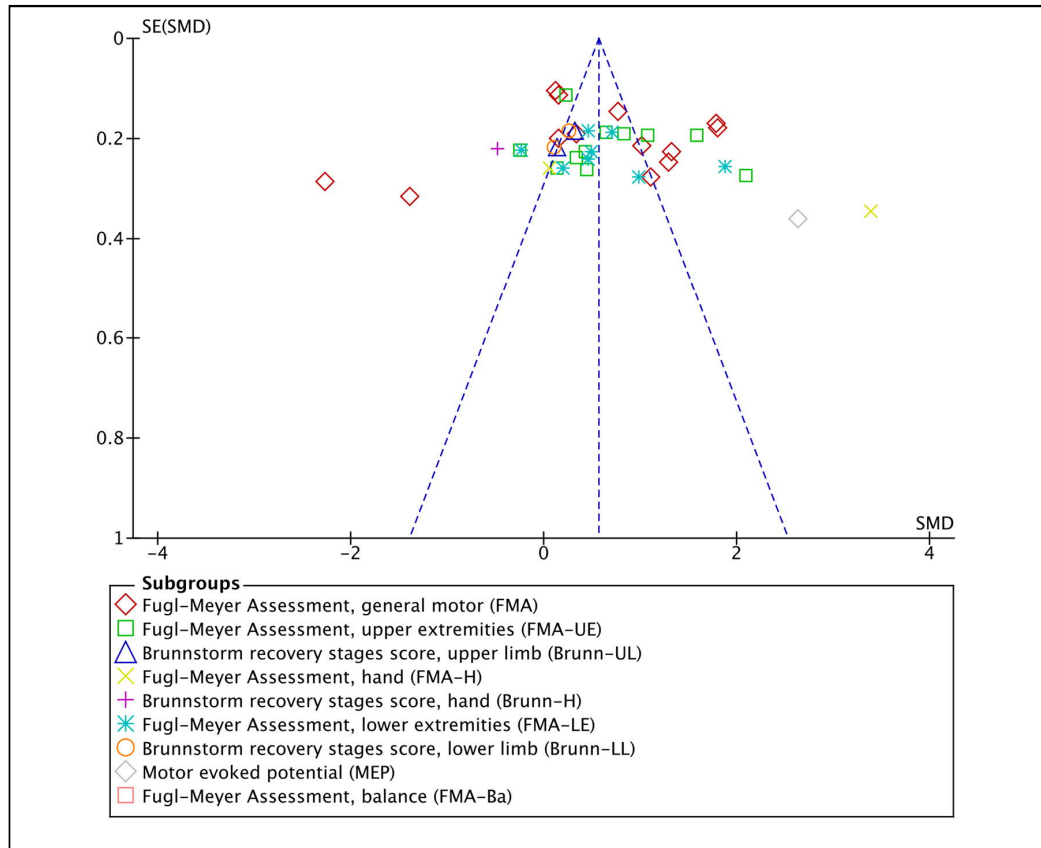

**Supplementary Figure 7.** Funnel plot for outcome: Improvement of depression

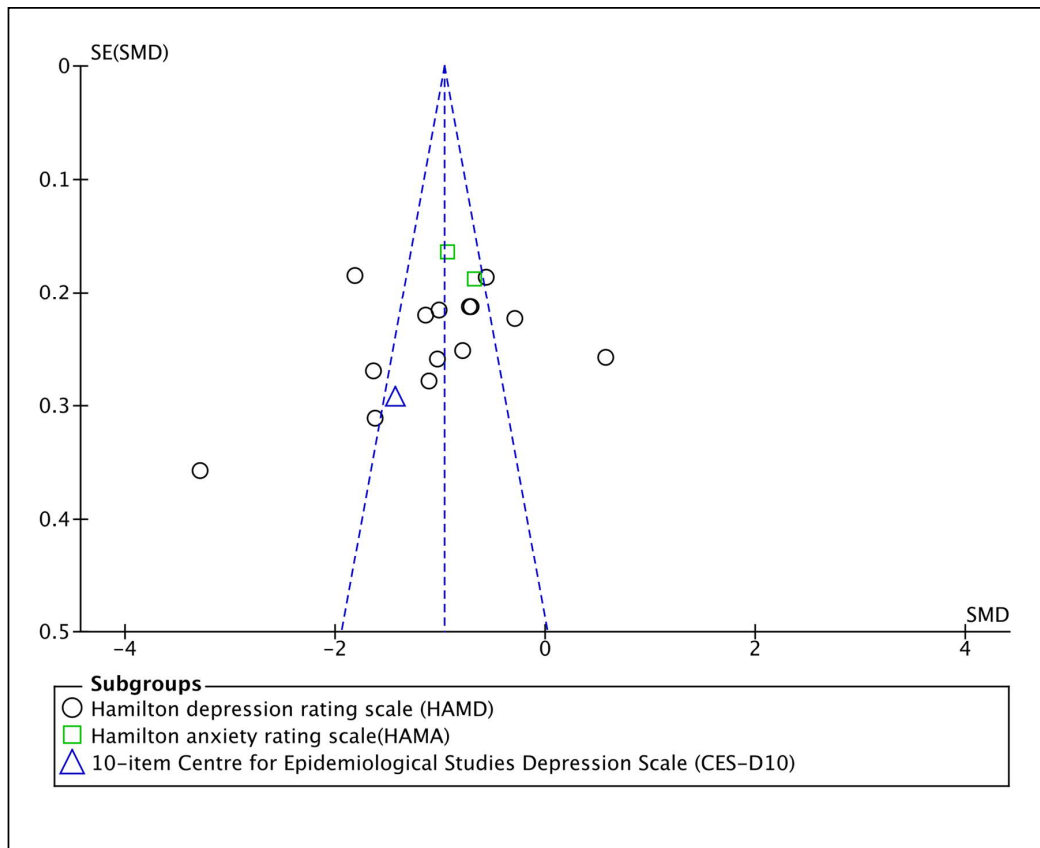



**Supplementary Figure 8.** Funnel plot for outcome: Improvement of swallowing function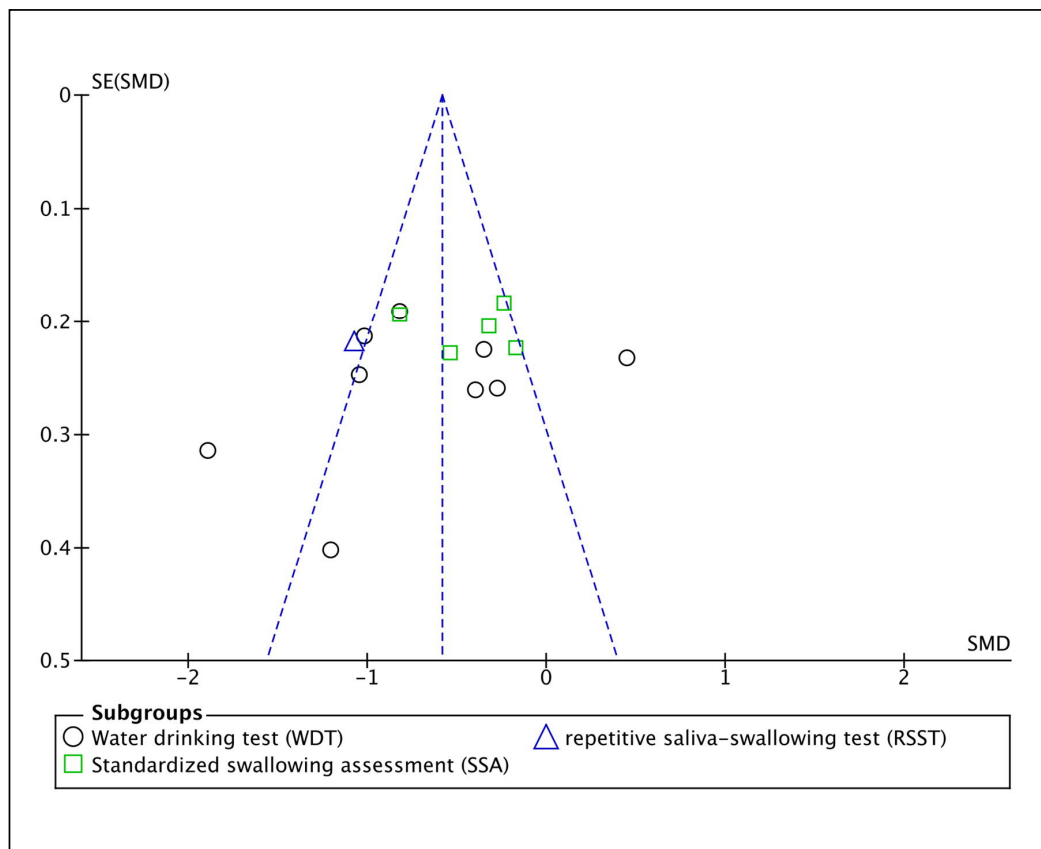

**Supplementary Figure 9. Comparison on duration of treatment: Improvement of dependency**

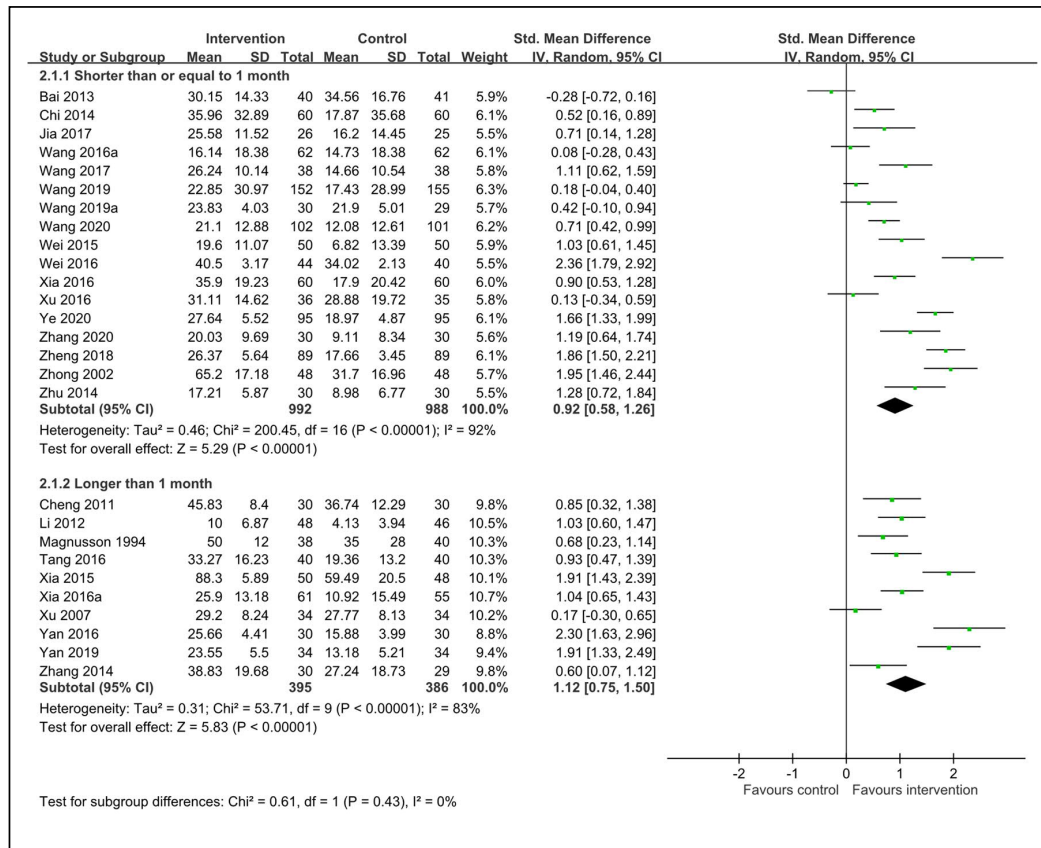

\* The reference for each study have been listed in Table 2 and 'List of included studies' references'.

**Supplementary Figure 10.** Comparison on duration of treatment: Improvement of motor function

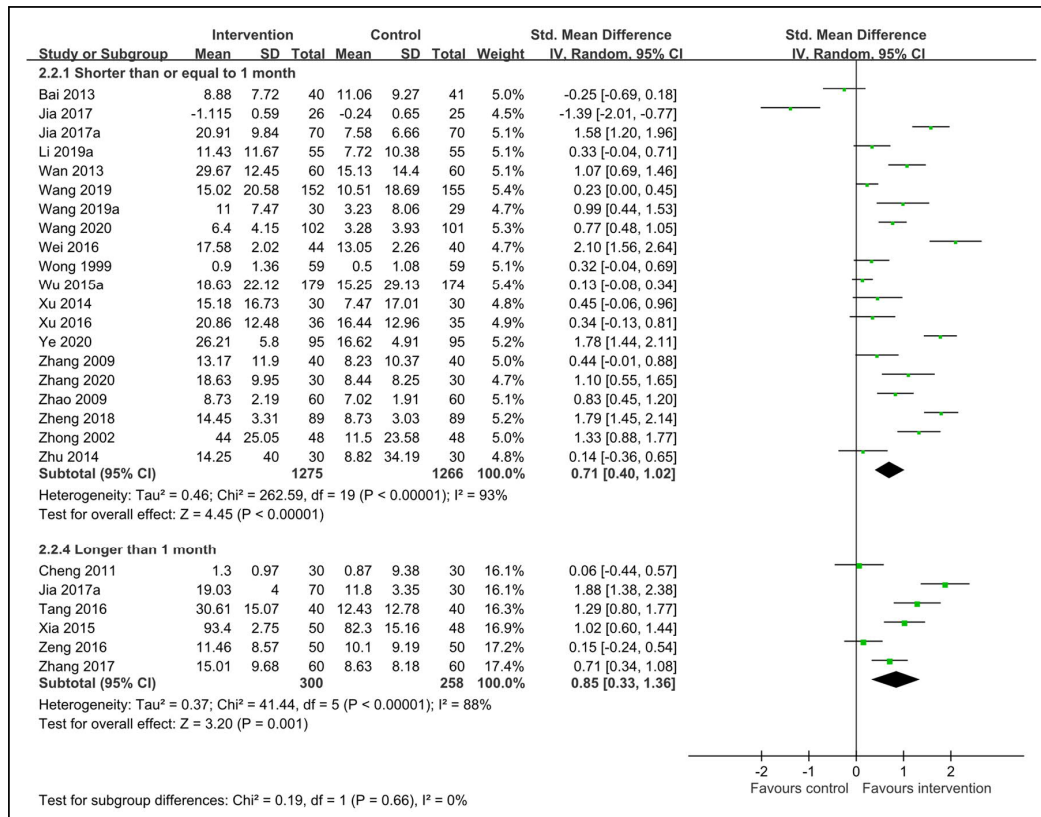

\* The reference for each study have been listed in Table 2 and 'List of included studies' references'.

## Supplementary Figure 11. Comparison on duration of treatment: Improvement of depression

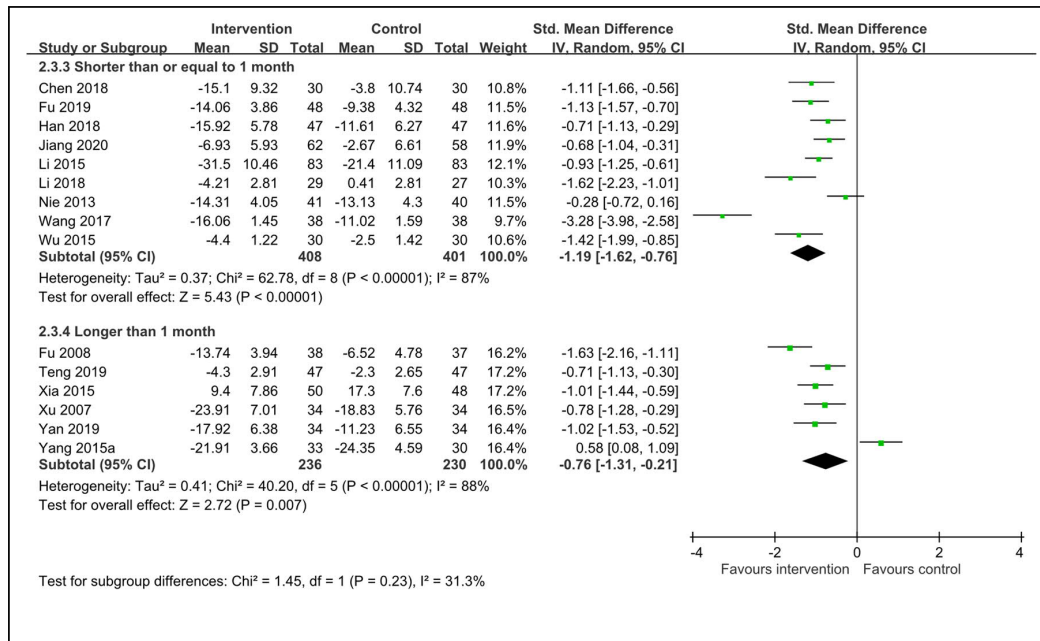

\* The reference for each study have been listed in Table 2 and 'List of included studies' references'.

## Supplementary Figure 12. Comparison on duration of treatment: Improvement of swallowing function

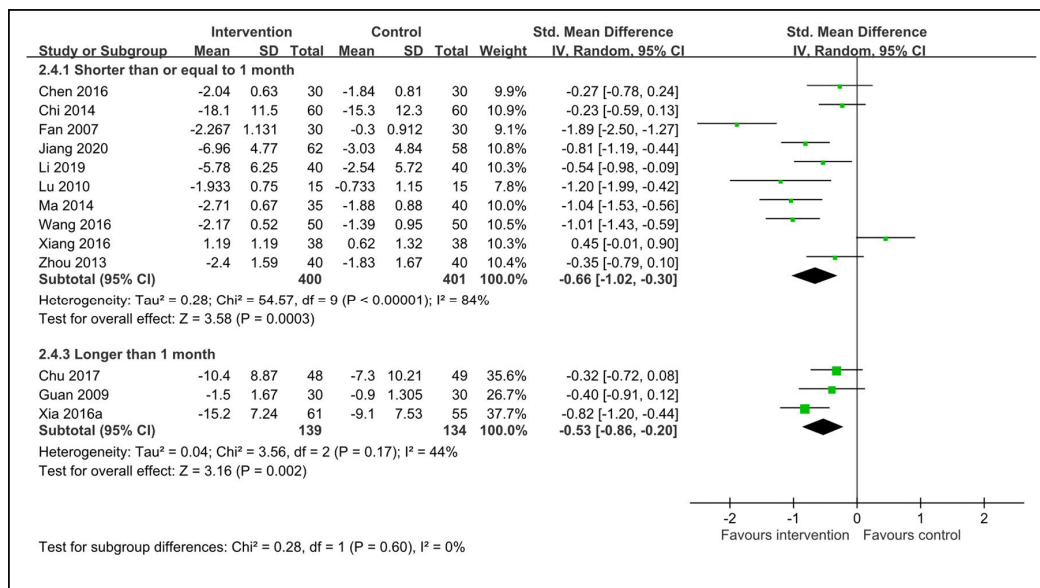

\* The reference for each study have been listed in Table 2 and 'List of included studies' references'.

## Criteria for judging risk of bias

1. Random sequence generation (selection bias)
  - Low risk: random number table; computer random number generator;
  - High risk: date of admission; odd or even clinic record number
  - Unclear risk: randomization was stated, but the process was not described
2. Allocation concealment (selection bias)
  - Low risk: central allocation (telephone or web-based); sequentially numbered sealed envelopes; or real-time randomization
  - High risk: participants or the investigators enrolling participants could potentially predict the assignments
  - Unclear risk: method of concealment was not described or not described in sufficient detail
3. Blinding participants and personnel (performance bias)
  - Low risk: Blinding of participants and key study personnel was ensured, or it was unlikely that the blinding was compromised, blinding of participants and personnel to the hypothesis or study objectives.
  - High risk: open label; no blinding or incomplete blinding; or attempted blinding of key study participants and personnel, but it was likely that the blinding was compromised
  - Unclear risk: insufficient information to permit the judgment of 'low risk' or 'high risk'
4. Blinding of outcome assessment (detection bias)
  - Low risk: Blinding of outcome assessment was ensured. No blinding of outcome assessment, but the review authors judged that the outcome measurement was not likely to be influenced by a lack of blinding
  - High risk: open label, no blinding of outcome assessment and the outcome measurement was likely to be influenced by lack of blinding
  - Unclear risk: insufficient information to permit the judgment of 'low risk' or 'high risk'
5. Incomplete outcome data (attrition bias)
  - Low risk: intention-to-treat analysis; no missing outcome data; reasons for missing outcome data unlikely to be related to outcome; or missing outcome data were balanced across intervention groups
  - High risk: 'As-treated' analysis; reason for missing outcome data likely to be related to outcome; proportion of missing outcomes compared with observed event risk was sufficient to induce clinically relevant bias in the intervention effect estimate
  - Unclear risk: insufficient reporting of dropout and exclusion to permit the judgment of 'low risk' or 'high risk' (e.g. number randomized not stated, no reasons for missing data provided)
6. Selective reporting (reporting bias)
  - Low risk: The study protocol was available, and all of the study's prespecified outcomes that were of interest in the review were reported in a prespecified manner; or the study protocol was not available, but it was clear that the published reports include all expected outcomes, including those that were prespecified
  - High risk: Not all of the study's prespecified outcomes were reported; or one or more reported primary outcomes were not prespecified
  - Unclear risk: insufficient information for a clear decision

### Risk of bias within studies

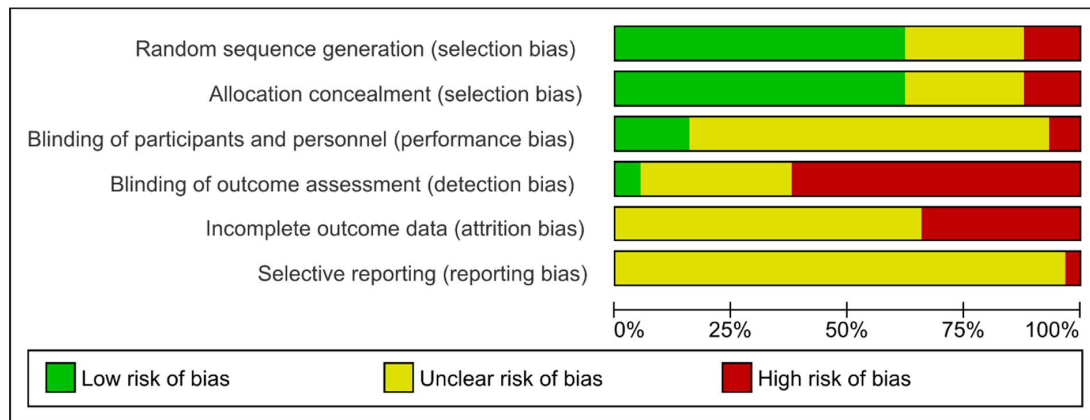

**Supplementary Figure 13.** Risk of bias graph

|                | Random sequence generation (selection bias) | Allocation concealment (selection bias) | Blinding of participants and personnel (performance bias) | Blinding of outcome assessment (detection bias) | Incomplete outcome data (attrition bias) | Selective reporting (reporting bias) |
|----------------|---------------------------------------------|-----------------------------------------|-----------------------------------------------------------|-------------------------------------------------|------------------------------------------|--------------------------------------|
| Bai 2013       | ?                                           | ?                                       | ?                                                         | ●                                               | ●                                        | ?                                    |
| Chen 2016      | +                                           | +                                       | ?                                                         | ●                                               | ●                                        | ?                                    |
| Chen 2018      | +                                           | +                                       | ?                                                         | ?                                               | ?                                        | ?                                    |
| Cheng 2011     | ●                                           | ●                                       | ?                                                         | ●                                               | ●                                        | ?                                    |
| Chi 2014       | ?                                           | ?                                       | ●                                                         | ?                                               | ●                                        | ●                                    |
| Chu 2017       | ●                                           | ●                                       | ?                                                         | ●                                               | ●                                        | ?                                    |
| Fan 2007       | +                                           | +                                       | ?                                                         | ●                                               | ?                                        | ?                                    |
| Fu 2008        | +                                           | +                                       | +                                                         | +                                               | ?                                        | ?                                    |
| Fu 2019        | +                                           | +                                       | ?                                                         | ●                                               | ?                                        | ?                                    |
| Guan 2009      | ●                                           | ●                                       | ?                                                         | ●                                               | ●                                        | ?                                    |
| Han 2018       | ●                                           | ●                                       | ?                                                         | ●                                               | ●                                        | ●                                    |
| Jia 2017       | +                                           | +                                       | ?                                                         | ?                                               | ?                                        | ?                                    |
| Jia 2017a      | ?                                           | ?                                       | ●                                                         | ●                                               | ●                                        | ?                                    |
| Jiang 2020     | +                                           | +                                       | ?                                                         | ●                                               | ●                                        | ?                                    |
| Li 2012        | +                                           | +                                       | ?                                                         | ●                                               | ●                                        | ?                                    |
| Li 2015        | ?                                           | ?                                       | ?                                                         | ●                                               | ?                                        | ?                                    |
| Li 2018        | +                                           | +                                       | +                                                         | +                                               | ?                                        | ?                                    |
| Li 2019        | +                                           | +                                       | ?                                                         | ●                                               | ●                                        | ?                                    |
| Li 2019a       | +                                           | +                                       | ?                                                         | ●                                               | ?                                        | ?                                    |
| Lu 2010        | ?                                           | ?                                       | ?                                                         | ●                                               | ●                                        | ?                                    |
| Ma 2014        | +                                           | +                                       | +                                                         | +                                               | ?                                        | ?                                    |
| Magnusson 1994 | ?                                           | ?                                       | ?                                                         | ?                                               | ?                                        | ?                                    |
| Nie 2013       | +                                           | +                                       | ?                                                         | ●                                               | ●                                        | ?                                    |
| Tang 2016      | ●                                           | ●                                       | ?                                                         | ●                                               | ?                                        | ?                                    |
| Teng 2019      | +                                           | +                                       | ?                                                         | ?                                               | ?                                        | ?                                    |



|            |   |   |   |   |   |   |
|------------|---|---|---|---|---|---|
| Wan 2013   | + | + | ? | ● | ? | ? |
| Wang 2016  | ? | ? | ? | ● | ● | ? |
| Wang 2016a | + | + | ? | ● | ● | ? |
| Wang 2017  | + | + | ? | ● | ? | ? |
| Wang 2019  | + | + | ? | ● | ? | ? |
| Wang 2019a | + | + | ? | ● | ? | ? |
| Wang 2020  | ? | ? | ● | ● | ● | ? |
| Wei 2015   | ? | ? | ? | ● | ? | ? |
| Wei 2016   | + | + | + | ? | ? | ? |
| Wong 1999  | + | + | ? | ? | ? | ? |
| Wu 2015    | + | + | ? | ? | ? | ? |
| Wu 2015a   | + | + | ? | ? | ? | ? |
| Xia 2015   | ? | ? | ? | ● | ? | ? |
| Xia 2016   | + | + | + | ? | ? | ? |
| Xia 2016a  | + | + | + | ? | ? | ? |
| Xiang 2016 | ? | ? | ? | ● | ● | ? |
| Xu 2007    | + | + | ? | ? | ? | ? |
| Xu 2014    | + | + | ? | ● | ? | ? |
| Xu 2016    | ? | ? | ? | ● | ● | ? |
| Yan 2016   | + | + | ● | ● | ● | ? |
| Yan 2019   | + | + | ? | ? | ? | ? |
| Yang 2015a | + | + | ? | ? | ? | ? |
| Ye 2020    | + | + | ? | ● | ? | ? |
| Zeng 2016  | + | + | ? | ? | ? | ? |
| Zhang 2009 | + | + | + | ? | ? | ? |
| Zhang 2014 | ● | ● | + | ? | ? | ? |
| Zhang 2017 | + | + | ? | ● | ? | ? |
| Zhang 2020 | + | + | ? | ● | ? | ? |
| Zhao 2009  | + | + | + | ? | ? | ? |
| Zheng 2018 | ? | ? | ? | ● | ? | ? |
| Zhong 2002 | ? | ? | ? | ● | ? | ? |
| Zhou 2013  | ● | ● | ? | ● | ● | ? |
| Zhu 2014   | ? | ? | ? | ? | ? | ? |

Supplementary Figure 14. Risk of bias summary

## Supplementary Tables

**Supplementary Table 1.** Search Strategy

|    |                                                                                                                                                                         |
|----|-------------------------------------------------------------------------------------------------------------------------------------------------------------------------|
| ■  | MEDLINE(Ovid), 1948 to 24 Jul 2019 and EMBASE(Ovid), 1974 to 24 Jul. 2019                                                                                               |
| 1  | exp basal ganglia cerebrovascular disease/                                                                                                                              |
| 2  | cerebrovascular disorders/                                                                                                                                              |
| 3  | exp brain ischemia/                                                                                                                                                     |
| 4  | exp carotid artery diseases/                                                                                                                                            |
| 5  | exp cerebral small vessel diseases/                                                                                                                                     |
| 6  | exp intracranial arterial diseases/                                                                                                                                     |
| 7  | exp "intracranial embolism and thrombosis"/                                                                                                                             |
| 8  | exp intracranial hemorrhages/                                                                                                                                           |
| 9  | stroke/                                                                                                                                                                 |
| 10 | exp brain infarction/                                                                                                                                                   |
| 11 | stroke, lacunar/                                                                                                                                                        |
| 12 | vasospasm, intracranial/                                                                                                                                                |
| 13 | vertebral artery dissection/                                                                                                                                            |
| 14 | (stroke or post stroke or post-stroke).tw.                                                                                                                              |
| 15 | (cerebrovasc\$ or brain vasc\$ or cerebral vasc\$ or cva\$ or apoplex\$ or SAH).tw.                                                                                     |
| 16 | ((brain\$ or cerebr\$ or cerebell\$ or intracran\$ or intracerebral) adj5 (isch?emi\$ or infarct\$ or thrombo\$ or emboli\$ or occlus\$)).tw.                           |
| 17 | ((brain\$ or cerebr\$ or cerebell\$ or intracerebral or intracranial or subarachnoid) adj5 (haemorrhage\$ or hemorrhage\$ or haematoma\$ or hematoma\$ or bleed\$)).tw. |
| 18 | hemiplegia/                                                                                                                                                             |
| 19 | exp paresis/                                                                                                                                                            |
| 20 | (hemipleg\$ or hemipar\$ or paresis or paretic).tw.                                                                                                                     |
| 21 | brain injuries/                                                                                                                                                         |
| 22 | brain injury, chronic/                                                                                                                                                  |
| 23 | 1 or 2 or 3 or 4 or 5 or 6 or 7 or 8 or 9 or 10 or 11 or 12 or 13 or 14 or 15 or 16 or 17 or 18 or 19 or 20 or 21 or 22                                                 |
| 24 | acupuncture/ or acupuncture therapy/ or acupuncture analgesia/ or acupuncture, ear/ or electroacupuncture/ or meridians/ or acupuncture points/ or trigger points/      |

- 25 (acupuncture\$ or electroacupuncture or electro-acupuncture or acupoint\$ or meridians or needling).tw.
- 26 ((meridian or non-meridian or trigger) adj10 point\$.tw.
- 27 24 or 25 or 26
- 28 exp drugs, chinese herbal/
- 29 exp medicine, chinese traditional/
- 30 exp Plants, Medicinal/
- 31 exp Medicine, Traditional/
- 32 exp Plant Extracts/
- 33 exp Phytotherapy/
- 34 phytopharmaceutic\$.mp.
- 35 herb\$.mp.
- 36 traditional medicine\$.mp.
- 37 traditional therap\$.mp.
- 38 herbal medicine\$.mp.
- 39 herbal therap\$.mp.
- 40 aconite root.mp.
- 41 camelia.mp.
- 42 cayenne.mp.
- 43 chinese cucumber.mp.
- 44 chrysanthemum flower\$.mp.
- 45 cocklebur fruit.mp.
- 46 cow dipper.mp.
- 47 croton seed.mp. or exp Croton/
- 48 ginger.mp. or exp Ginger/
- 49 ginkgo.mp. or exp Ginkgo biloba/
- 50 ginseng.mp. or exp Panax/
- 51 goji berry.mp.
- 52 horny goat weed.mp.
- 53 rhubarb.mp. or exp Rheum/
- 54 thunder vine.mp.
- 55 strychnine tree.mp.
- 56 sweet wormwood.mp.
- 57 willow bark.mp.
- 58 27 or 28 or 29 or 30 or 31 or 32 or 33 or 34 or 35 or 36 or 37 or 38 or 39 or 40 or 41 or 42 or 43 or 44 or 45 or 46 or 47 or 48 or 49 or 50 or 51 or 52 or 53 or 54 or 55 or 56 or 57
- 59 23 and 58

|                                                              |                                                                                                                                    |
|--------------------------------------------------------------|------------------------------------------------------------------------------------------------------------------------------------|
| 60                                                           | (animals not (human and animals)).sh.                                                                                              |
| 61                                                           | 59 not 60                                                                                                                          |
| <p>■ Cochrane (Wiley interface), searched on 24 Jul 2019</p> |                                                                                                                                    |
| 1                                                            | MeSH descriptor: [Medicine, Chinese Traditional] explode all trees                                                                 |
| 2                                                            | MeSH descriptor: [Drugs, Chinese Herbal] explode all trees                                                                         |
| 3                                                            | MeSH descriptor: [Medicine, Traditional] explode all trees                                                                         |
| 4                                                            | ((traditional or herbal) and (therap* or medicine*)):ti,ab,kw                                                                      |
| 5                                                            | #1 or #2 or #3 or #4                                                                                                               |
| 6                                                            | (acupuncture):ti,ab,kw OR (electroacupuncture):ti,ab,kw OR (meridians):ti,ab,kw OR (acupuncture*):ti,ab,kw OR (acupoints):ti,ab,kw |
| 7                                                            | ((meridian or non-meridian or trigger) adj10 point\$):ti,ab,kw                                                                     |
| 8                                                            | MeSH descriptor: [Acupuncture Therapy] explode all trees                                                                           |
| 9                                                            | #6 or #7 or #8                                                                                                                     |
| 10                                                           | #5 or #9                                                                                                                           |
| 11                                                           | MeSH descriptor: [Stroke Rehabilitation] explode all trees                                                                         |
| 12                                                           | (stroke):ti,ab,kw                                                                                                                  |
| 13                                                           | #11 or #12                                                                                                                         |
| 14                                                           | #10 and #13                                                                                                                        |
| <p>■ CNKI, 1915 to 24 Jul 2019</p>                           |                                                                                                                                    |
| 1                                                            | SU=(卒中+脑梗+心梗)*(针+中医+中药)*(随机+对照)                                                                                                    |

**Supplementary Table 2.** Characteristics of included studies (ordered by study ID)

| ID                       | Title                                                                                                                                             | Method | No. of participants | Age range   | Type of health problem | Disease course    | Duration of Treatment | Name of decoction and herbal medicine or acupoints                                                                                                                                               | Outcomes   | No. of Drop outs | Duration of follow-up | Is blind method used in outcome assessment? If yes, who is/are blinded? |
|--------------------------|---------------------------------------------------------------------------------------------------------------------------------------------------|--------|---------------------|-------------|------------------------|-------------------|-----------------------|--------------------------------------------------------------------------------------------------------------------------------------------------------------------------------------------------|------------|------------------|-----------------------|-------------------------------------------------------------------------|
| Bai 2013 <sup>[35]</sup> | Prospective, randomized controlled trial of physiotherapy and acupuncture on motor function and daily activities in patients with ischemic stroke | RCT    | 120                 | 61.54 ±9.47 | Motor function problem | 15 days - 90 days | 4 weeks               | Baihui, Jianyu, Jianzhen, Quchi, Waiguan, Hegu, Yanglingquan, Kunlun, Juegu, Huantiao, Fengshi, Neiguan, Shangqiu, Taichong, Yinlingquan, Sanyingjiao, Yingu, Daling, Houxi, Jiquan, Chize, Quze | FMA<br>MBI | NA               | NA                    | NA                                                                      |

|                            |                                                                                                                                  |           |     |                                    |                        |                                                |         |                                                                                           |                                          |    |         |    |
|----------------------------|----------------------------------------------------------------------------------------------------------------------------------|-----------|-----|------------------------------------|------------------------|------------------------------------------------|---------|-------------------------------------------------------------------------------------------|------------------------------------------|----|---------|----|
| Chen 2018 <sup>[23]</sup>  | Effect of early acupuncture intervention on post - stroke depression: a randomized controlled trial                              | RCT       | 60  | 36 - 75                            | Depression             | 4 to 30 days                                   | 4 weeks | Baihui, Sishencong, Neiguan, Hegu, Taixi, Taichong, Zusanli, Xuehai                       | Clinical effective rate<br>HAMD<br>MESSS | NA | 4 Weeks | NA |
| Cheng 2011 <sup>[14]</sup> | Post - stroke hand dysfunction treated with acupuncture at Zhongzhu (TE 3) and Waiguan (TE 5)                                    | Quasi-RCT | 60  | ^ 41 - 74<br>* 43 - 77             | Motor function problem | ^ 86.6 ± 16.2 days<br>* 88.1 ± 12.5 days       | 8 weeks | Waiguan, Zhongzhu                                                                         | FMA - Hand<br>NIHSS<br>Holden<br>ADL     | NA | NA      | NA |
| Xia 2010 <sup>[36]</sup>   | Combination of Feeding - Swallowing Training and Acupuncture: an Effective Rehabilitation Method for Post - Stroke Dysphagia     | RCT       | 120 | ^ 65.32 ± 14.85<br>* 66.40 ± 15.63 | Dysphagia              | ^ 8.94 ± 3.62 days<br>* 9.20 ± 13.78 days      | 4 weeks | Yamen, Fengchi, Jingjiaji, Lianquan, Baihui, Zhaohai                                      | SSA<br>VFSS<br>MBI<br>SW - AL - QOL      | NA | NA      | NA |
| Chu 2017 <sup>[34]</sup>   | Effects of GAO's neck acupuncture on swallowing function and quality of life in patients with post - stroke pseudobulbar palsy:a | Quasi-RCT | 100 | ^ 67 ± 11<br>* 67 ± 10             | Dysphagia              | acu: 41.1 ± 38.6 days<br>ctr: 40.5 ± 30.8 days | 8 weeks | Fengchi, Yiming, Gongxue, Zhiqiang, Tunyan, Fayin, Lianquan, exteriorJinjin, exteriorYuye | RSST<br>SSA<br>SWAL - QOL<br>WDT         | 3  | NA      | NA |

|                           |                                                                                                                                 |           |     |                                           |                |                                                       |         |                                                                                                     |                                 |    |    |                        |
|---------------------------|---------------------------------------------------------------------------------------------------------------------------------|-----------|-----|-------------------------------------------|----------------|-------------------------------------------------------|---------|-----------------------------------------------------------------------------------------------------|---------------------------------|----|----|------------------------|
|                           | randomized controlled trial                                                                                                     |           |     |                                           |                |                                                       |         |                                                                                                     |                                 |    |    |                        |
| Fan 2007 <sup>[28]</sup>  | Clinical Observations on Acupuncture Treatment of Post - Stroke Dysphagia                                                       | RCT       | 60  | NA                                        | Dysphagia      | NA                                                    | NA      | Tiantu, anteriorLianquan, upperLianquan, Lianquan, Fengchi, Wangu, Lieque, Fuliu, Zusanli, Fenglong | WDT<br>Clinical effective rate  | NA | NA | NA                     |
| Fu 2008 <sup>[19]</sup>   | Efficacy and safety of Deanxit combined with Wuling Capsule in treating post - stroke depression: a randomized controlled trial | RCT       | 120 | 45 - 78                                   | Depression     | NA                                                    | 6 weeks | Wuling Capsule: Wulingjun                                                                           | Clinical effective rate<br>HAMD | 6  | NA | yes; outcome assessors |
| Guan 2009 <sup>[37]</sup> | Therapeutic effect of acupuncture plus deglutition training on patients with dysphagia caused by brainstem stroke               | Quasi-RCT | 60  | <sup>^</sup><br>61.2±6.5<br>*<br>59.3±7.1 | Dysphagia      | <sup>^</sup><br>23.25±6.07<br>*<br>25.11±5.54<br>days | 2month  | Lianquan, Tiantu, Fengchi, Renying, Hegu                                                            | WDT                             |    | NA | NA                     |
| Jia 2017 <sup>[38]</sup>  | Spasmodic hemiplegia after stroke treated with scalp acupuncture, music                                                         | RCT       | 76  | <sup>^</sup><br>61±11<br>58±12            | Motor function | 2 week - 3 months                                     | 4 weeks | anteriorShencong, Xuanli, Baihui, Qubin                                                             | FMA<br>BI<br>MAS                | NA | NA | NA                     |

|                         |                                                                                                                                    |     |     |                          |                    |                         |                    |                                                                                               |                                                  |    |         |                        |
|-------------------------|------------------------------------------------------------------------------------------------------------------------------------|-----|-----|--------------------------|--------------------|-------------------------|--------------------|-----------------------------------------------------------------------------------------------|--------------------------------------------------|----|---------|------------------------|
|                         | therapy and rehabilitation: a randomized controlled trial                                                                          |     |     | *<br>63±11               | problem            |                         |                    |                                                                                               |                                                  |    |         |                        |
| Li 2012 <sup>[19]</sup> | Observation on therapeutic effect of acupuncture combined with medicine on mild cognition disorders in patients with post - stroke | RCT | 100 | 40 - 79                  | Cognitive disorder | NA                      | 3 months           | Baihui, Shenting, Qucha, Shencong, Fengchi, Neiguan, Hegu, Zusanli, Sanyinjiao, Daxi, Zhaohai | Clinical effective rate<br>MMSE<br>HDS - R<br>BI | 6  | NA      | NA                     |
| Li 2015 <sup>[20]</sup> | 83 cases of depression due to stroke treated with therapy of integrated traditional Chinese and western medicine                   | RCT | 166 | 30 - 75                  | Depression         | 1 to 24 months          | 1 month            | Modified Xiaoyansan:Baishao, Danggui, Chuanxiong, Chaihu, Yujin, Taoren, Honghua, Zhigancao   | Clinical effective rate<br>HAMA<br>HAMD          | NA | NA      | NA                     |
| Li 2018 <sup>[39]</sup> | Clinical observation on auricular magnetotherapy for convalescent stroke patients with depression                                  | RCT | 93  | ^<br>59±11<br>*<br>59±12 | Depression         | NA                      | 4 weeks            | Gan, Xin, Pi, Shen, Shenmen, Pizhixia                                                         | Clinical effective rate<br>HAMD<br>SS - QOL      | 10 | 4 weeks | yes, outcome accessors |
| Li 2019 <sup>[29]</sup> | Influence of nape acupuncture therapy on swallowing function of patients with cerebral infarction                                  | RCT | 80  | ^ 40<br>* 40             | Dysphagia          | ^<br>61.9±7.9 days<br>* | ^<br>16.9±7.1<br>* | Fengchi, Yiming, Gongxue, Zhiqiang, Tunyan, Lianquan, exteriorJinjin, exteriorYuye            | FEES<br>WDT<br>SSA<br>PAS                        |    | NA      | NA                     |



|                         |                                                                                                              |     |     |                                                                          |           |                                                                                         |          |                                           |                                |    |    |                                       |
|-------------------------|--------------------------------------------------------------------------------------------------------------|-----|-----|--------------------------------------------------------------------------|-----------|-----------------------------------------------------------------------------------------|----------|-------------------------------------------|--------------------------------|----|----|---------------------------------------|
|                         |                                                                                                              |     |     |                                                                          |           | 63.6±6.9 days                                                                           | 18.5±8.1 |                                           |                                |    |    |                                       |
| Lu 2010 <sup>[30]</sup> | Therapeutic effects of neuromuscular electrical stimulation and electroacupuncture for dysphagia post stroke | RCT | 45  | 59.87±7.94<br>^<br>60.65±9.33<br>*<br>60.96±8.25                         | Dysphagia | 18.79±5.88 days<br>^<br>17.85±7.09 days<br>*<br>17.53±5.62 days                         | 3 weeks  | Lianquan, Hegu, Neiguan, Zusanli, Zhaohai | WDT<br>VFSS                    | NA | NA | NA                                    |
| Ma 2014 <sup>[40]</sup> | Post - stroke dysphagia treated with acupoint injection combined with neural electrical stimulation          | RCT | 183 | ^<br>50.6±11.1<br>47.25±10.5<br>*<br>51.2±10.8<br>49.9±11.8<br>51.5±10.9 | Dysphagia | ^<br>25.3±8.4 days<br>23.8±5.2 days<br>*24.4±7.1 days<br>25.2±6.9 days<br>24.5±5.7 days | 30days   | Tunyanxue                                 | WDT<br>Clinical effective rate | 55 | NA | yes; outcome assessors, data analysts |

|                               |                                                                                                                        |     |     |              |                        |                                                             |          |                                                                                                |                                                                                  |        |       |    |
|-------------------------------|------------------------------------------------------------------------------------------------------------------------|-----|-----|--------------|------------------------|-------------------------------------------------------------|----------|------------------------------------------------------------------------------------------------|----------------------------------------------------------------------------------|--------|-------|----|
| Magnuson 1994 <sup>[41]</sup> | Sensory stimulation with acupuncture promotes normalization of the dynamic control of posture after hemispheric stroke | RCT | 78  | 54 - 89      | Motor function problem | ≤10days                                                     | 11 weeks | upperJuxu, Zusanli, Yanglingquan, Yuji, Chize, Waiguan, Baihui, Yinshi, Zhongfu, Taichong      | Barthel Index<br>Balance score                                                   | 30days | 1year | NA |
| Nie 2013 <sup>[25]</sup>      | Post - stroke depression treated with acupuncture and moxibustion: an evaluation of therapeutic effect and safety      | RCT | 123 | 51 - 81      | Depression             | NA                                                          | 4 weeks  | Acupuncture: Hegu, Taichong, Baihui, Yintang<br>Moxibustion: Zhongwan, Xiawan, Guanyuan, Qihai | Clinical effective rate<br>HAMD<br>BI                                            | NA     | NA    | NA |
| Wang 2016 <sup>[31]</sup>     | The study of acupuncture and swallowing training in the treatment of dysphagia after stroke                            | RCT | 100 | ^ 50<br>* 50 | Dysphagia              | ^ 134.28±<br>58.34<br>days<br>*<br>128.35±<br>74.31<br>days | 28 days  | Fengchi, Wangu, Tianzhu, Lianquan, interiorDaying, Fenglong, Jinjin, Yuye                      | WDT<br>Fujishima<br>Ichiro<br>swallowing effect score<br>Clinical effective rate |        | NA    | NA |

|                            |                                                                                                                   |     |     |                                            |                        |                                                                   |         |                                                                                                 |                                                       |    |          |                         |
|----------------------------|-------------------------------------------------------------------------------------------------------------------|-----|-----|--------------------------------------------|------------------------|-------------------------------------------------------------------|---------|-------------------------------------------------------------------------------------------------|-------------------------------------------------------|----|----------|-------------------------|
| Wang 2019 <sup>[42]</sup>  | Effect of Tui Na on upper limb spasticity after stroke: a randomized clinical trial                               | RCT | 444 | 18 - 75                                    | Motor function problem | 1 to 3 months (270)<br>4 to 6 months (101)<br>7 to 12 months (67) | 4 weeks | Jianyu, Jianliao, Quchi, Neiguan, Waiguan, Shousanli, Yangchi, Hegu                             | Mini - Mental Status Examination<br>MAS<br>FMA<br>MBI | 54 | 24 weeks | NA                      |
| Wang 2019a <sup>[10]</sup> | Effects of acupuncture treatment on lower limb spasticity in patients following hemorrhagic stroke: A pilot study | RCT | 59  | 40 - 70                                    | Motor function problem | 30 to 90 days                                                     | 4 weeks | Baihui, Taiyang, Yinmen, Fuxi, Xiyangguan, Yanglingquan, Zusanli, Tiaokou, Taichong             | MAS<br>FMA<br>BI<br>MEP<br>IEMG                       | 0  | NA       | NA                      |
| Wei 2015 <sup>[11]</sup>   | Clinical study of acupuncture combined with rehabilitation training in the treatment of dysphagia after stroke    | RCT | 100 | ^<br>61.50<br>±4.20<br>*<br>62.50<br>±4.90 | Dysphagia              | NA                                                                | 2 weeks | Lianquan, Tiantu, Jinjin, Yuye, Hegu, Neiguan, Zusanli                                          | MBI<br>FIM                                            | NA | NA       | NA                      |
| Wei 2016 <sup>[43]</sup>   | Synergistic effect of moxibustion and rehabilitation training in functional recovery of                           | RCT | 84  | ^<br>53.15<br>±14.2<br>3<br>*              | Motor function problem | ^<br>61.61±8<br>.75<br>days<br>*                                  | 4 weeks | Zhongdi, Jiansui, Quchi, Shousanli, Waiguan, Hegu, Yanglingquan, Zusanli, Xuanzhong, Sanyinjiao | Brunnstrom<br>MAS<br>CSI<br>FMA                       | NA | 6 months | yes , outcome assessors |

|                              |                                                                            |     |     |                                           |                                      |                                                           |         |                                                                                                                                                                                                             |            |    |    |    |
|------------------------------|----------------------------------------------------------------------------|-----|-----|-------------------------------------------|--------------------------------------|-----------------------------------------------------------|---------|-------------------------------------------------------------------------------------------------------------------------------------------------------------------------------------------------------------|------------|----|----|----|
|                              | post - stroke spastic hemiplegia                                           |     |     | 52.52<br>±13.5<br>1                       |                                      | 51.44±8<br>.143<br>days<br>(2<br>weeks<br>to 2<br>months) |         |                                                                                                                                                                                                             | MBI<br>PRO |    |    |    |
| Wong<br>1999 <sup>[44]</sup> | Clinical trial of electrical acupuncture on hemiplegic stroke patients     | RCT | 118 | ^ 21 -<br>80<br>* 25 -<br>78              | Motor<br>functi<br>on<br>proble<br>m | 10 - 14<br>days<br>from<br>onset                          | 2 weeks | Jianjing, Jianliao,<br>Shousanli, Hegu, Futu,<br>Xuehai, Yanglingquan,<br>Taichong                                                                                                                          |            |    | NA | NA |
| Wu<br>2015 <sup>[26]</sup>   | 30 cases of depression of post stroke with treatment Kaiyu Ditan Decoction | RCT | 60  | ^<br>58.1±<br>10.72<br>*<br>59.3±<br>9.97 | Depre<br>ssion                       | NA                                                        | 4 weeks | Kaiyuditan Decoction :<br>Banxia, Chenpi, Zhizi,<br>Zhuru, Dannanxing,<br>Shichangpu, Yujin,<br>Fuling, Zhishi, Qingpi,<br>Houpu, Chaihu, Foshou,<br>Zisu, Chuanxiong,<br>Chaobaizhu,<br>Shengjiang, Gancao | CES - D10  | NA | NA | NA |

|                          |                                                                                                                                                 |     |     |                                                                                                                                                                                         |                                      |                                                                                                                                                                                                                                      |         |                                                                                                                                          |                                       |    |             |    |
|--------------------------|-------------------------------------------------------------------------------------------------------------------------------------------------|-----|-----|-----------------------------------------------------------------------------------------------------------------------------------------------------------------------------------------|--------------------------------------|--------------------------------------------------------------------------------------------------------------------------------------------------------------------------------------------------------------------------------------|---------|------------------------------------------------------------------------------------------------------------------------------------------|---------------------------------------|----|-------------|----|
| Wu 2015a <sup>[16]</sup> | Effect of Acupuncture Combined Physical Training and Relearning on Stroke Rehabilitation: a Multi - center Randomized Controlled Clinical Study | RCT | 364 | ^(Cent<br>re1 :<br>64.92<br>±11.5<br>1<br>Centre<br>2 :<br>63.56<br>±13.2<br>5<br>Centre<br>3 :<br>60.30<br>±9.29<br>Centre<br>4 :<br>66.00<br>±10.6<br>4)<br>*(Cen<br>tre 1 :<br>64.51 | Motor<br>functi<br>on<br>proble<br>m | ^(Centr<br>e 1 :<br>25.80±1<br>9.15<br>Centre<br>2 :<br>24.53±1<br>5.03<br>Centre<br>3 :<br>18.08±2<br>0.73<br>Centre<br>4 :<br>17.45±4<br>.69)<br>*(Centr<br>e 1 :<br>25.69±1<br>9.87<br>Centre<br>2 :<br>26.75±1<br>5.44<br>Centre | 4 weeks | Yintang, Baihui,<br>Sishencong, Fengchi,<br>Jianyu, Quchi,<br>Waiguan, Hegu,<br>Huantiao, Zusanli,<br>Xuanzhong, Sanyinjiao,<br>Taichong | Fugl -<br>Meyer<br>Score<br>FIM Score | NA | 5<br>months | NA |
|--------------------------|-------------------------------------------------------------------------------------------------------------------------------------------------|-----|-----|-----------------------------------------------------------------------------------------------------------------------------------------------------------------------------------------|--------------------------------------|--------------------------------------------------------------------------------------------------------------------------------------------------------------------------------------------------------------------------------------|---------|------------------------------------------------------------------------------------------------------------------------------------------|---------------------------------------|----|-------------|----|

|                             |                                                                                                        |     |     |                                                                                                                                     |                |                                                            |         |                                                                                        |                           |    |             |    |
|-----------------------------|--------------------------------------------------------------------------------------------------------|-----|-----|-------------------------------------------------------------------------------------------------------------------------------------|----------------|------------------------------------------------------------|---------|----------------------------------------------------------------------------------------|---------------------------|----|-------------|----|
|                             |                                                                                                        |     |     | ±11.4<br>1<br>Centre<br>2 :<br>60.53<br>±13.4<br>7<br>Centre<br>3 :<br>60.48<br>±10.6<br>5<br>Centre<br>4 :<br>63.50<br>±11.3<br>8) |                | 3 :<br>20.25±1<br>9.75<br>Centre<br>4 :<br>22.00±5<br>.03) |         |                                                                                        |                           |    |             |    |
| Xia<br>2015 <sup>[12]</sup> | Clinical observation of<br>acupuncture plus<br>rehabilitation training for<br>post - stroke depression | RCT | 108 | 67±8                                                                                                                                | Depre<br>ssion | ^<br>40.2±13<br>.7 days<br>*                               | 8 weeks | Yintang, Baihui,<br>Sishencong, Zusanli,<br>Sanyinjiao, Taichong,<br>Neiguan, Shuigou, | ADL<br>HAMD<br>FMA<br>MBI | 10 | 3<br>months | NA |

|                           |                                                                                                                                                                   |     |     |                         |            |                                   |                                                       |                                                                                                              |                                     |                |          |                        |
|---------------------------|-------------------------------------------------------------------------------------------------------------------------------------------------------------------|-----|-----|-------------------------|------------|-----------------------------------|-------------------------------------------------------|--------------------------------------------------------------------------------------------------------------|-------------------------------------|----------------|----------|------------------------|
|                           |                                                                                                                                                                   |     |     |                         |            | 38.9±11.6 days                    |                                                       | Jiquan, Chize, Weizhong, Shenting                                                                            |                                     |                |          |                        |
| Xia 2016 <sup>[45]</sup>  | Does the addition of specific acupuncture to standard swallowing training improve outcomes in patients with dysphagia after stroke? a randomized controlled trial | RCT | 124 | 40 - 80                 | Dysphagia  | 4 - 12 days                       | six days of therapy per week for a four - week period | Fengchi, Jiaji, Lianquan, Jiajianquan, Baihui, Lieque, Fenglong, Sanyinjiao, Jinjin, Yuye, Taixi, Zhaohai    | SSA<br>DOSS<br>MBI<br>SWAL - QOL    | 4 A(2)<br>B(2) | NA       | yes, evaluators        |
| Xia 2016a <sup>[13]</sup> | Post - stroke dysphagia treated with acupuncture of meridian differentiation:a randomized controlled trial                                                        | RCT | 116 | ^<br>67±9<br>*<br>66±10 | Dysphagia  | ^<br>21.8±9.5<br>*<br>re:20.4±8.7 | 6 weeks                                               | Neiguan, Shuigou, Sanyinjiao, Jiquan, Chize, Weizhong, Baihui, Fengchi, Lianquan, Jialiangquan, Jinjin, Yuye | SSA<br>VFSS<br>MBI<br>SW - AL - QOL | 14             | 3 months | yes; outcome assessors |
| Xu 2007 <sup>[5]</sup>    | Observation on effect of Wuling Capsule in treating poststroke depression                                                                                         | RCT | 108 | 44 - 79                 | Depression | NA                                | 3 months                                              | Wuling Capsule:<br>Wulingjun                                                                                 | HAMD<br>MMSE<br>SSS<br>BI           | 4              | NA       | NA                     |

|                            |                                                                                                                                                                                 |     |     |                          |                        |                                    |         |                                                                                                |                                                       |    |    |                        |
|----------------------------|---------------------------------------------------------------------------------------------------------------------------------------------------------------------------------|-----|-----|--------------------------|------------------------|------------------------------------|---------|------------------------------------------------------------------------------------------------|-------------------------------------------------------|----|----|------------------------|
| Yan 2016 <sup>[46]</sup>   | Therapeutic observation of thunder - fire moxibustion at Dazhui (GV14) and Shenshu (BL23) plus cognitive training for mild cognitive impairment due to ischemic cerebral stroke | RCT | 60  | 43 - 80                  | Cognitive disorder     | NA                                 | 8 weeks | Dazhui, Shenshu                                                                                | Clinical effective rate<br>MoCA<br>MMSE<br>ADL<br>WMS | NA | NA | NA                     |
| Yang 2015a <sup>[27]</sup> | Clinical observation on the treatment with acupuncture combined with medicine on 33 cases with depression after apoplexy                                                        | RCT | 63  | 30 - 80                  | Depression             | 1.94 years                         | 6 weeks | Shenmen, Naogan, Xinggan, Shen                                                                 | Clinical effective rate<br>HAMD                       | NA | NA | NA                     |
| Zeng 2016 <sup>[47]</sup>  | Clinical study on acupuncture for ambulation disturbance in subacute stage of cerebral stroke                                                                                   | RCT | 100 | ^<br>66±12<br>*<br>68±10 | Motor function problem | ^<br>34.74±2.92<br>*<br>34.18±2.86 | 8 weeks | Jiayu, Naohui, Shousanli, Waiguan, Zhongzhu, Chengfu, Yinmen, Weizhong, Yanglingquan, Chengjin | NIHSS<br>FMA<br>Bathel Score<br>FAC<br>Safety         | NA | NA | NA                     |
| Zhang 2009 <sup>[17]</sup> | Effect of heat - reinforcing needling combined with rehabilitation training on                                                                                                  | RCT | 80  | ^<br>65.9±11.1<br>*      | Motor function         | <= 2 weeks                         | 3 weeks | Jiayu, Quchi, Hegu, Yanglingquan, Yinlingquan, Zusanli, Sanyinjiao                             | Fugl - Meyer effective rate                           | NA | NA | yes; outcome assessors |



|                            |                                                                                                                                                          |           |     |                                 |                        |                                    |          |                                                                                                                                 |                                   |    |    |                                                                       |
|----------------------------|----------------------------------------------------------------------------------------------------------------------------------------------------------|-----------|-----|---------------------------------|------------------------|------------------------------------|----------|---------------------------------------------------------------------------------------------------------------------------------|-----------------------------------|----|----|-----------------------------------------------------------------------|
|                            | the motor function of ischemic stroke patients                                                                                                           |           |     | 69.2±9.7                        | problem                |                                    |          |                                                                                                                                 |                                   |    |    |                                                                       |
| Zhang 2014 <sup>[48]</sup> | Observation on efficacy of acupuncture combined with rehabilitation training for post - stroke balance disorders                                         | Quasi-RCT | 59  | 30 - 75                         | Balance disorder       | 3 to 11 months                     | 16 weeks | Dazhu, Dushu, Ganshu, Shenshu, Dachangshu, Guanyuanshu, Futonggu, Huangshu, Qixue, Liangmen, Tianshu, Daju, Fushe, Daheng, Fuai | Berg score<br>ADL                 | NA | NA | NA                                                                    |
| Zhang 2017 <sup>[49]</sup> | Neuronavigation - Assisted Aspiration and Electro - Acupuncture for Hypertensive Putaminal Hemorrhage: A Suitable Technique on Hemiplegia Rehabilitation | RCT       | 240 | ^<br>57.2±9.6<br>*<br>56.72±8.3 | Motor function problem | NA                                 | 8 weeks  | Jiquan, Quchi, Shousanli, Hegu, Waiguan, Jianyu, Jianliao, Binao, Yanglingquan, Zusanli, Baihui, Dazhui, Chengshan, Sanyinjiao  | FMA - UL<br>FMA - LL<br>MAS<br>BI | NA | NA | NA                                                                    |
| Zhao 2009 <sup>[18]</sup>  | Effect of acupuncture treatment on spastic states of stroke patients                                                                                     | RCT       | 131 | ^<br>58.50±11.60<br>*<br>60.27  | Motor function problem | ^<br>16.34±6.09<br>*<br>16.76±6.89 | 30days   | Neiguan, Sanyinjiao, Shuigou, Jiquan, Chize, Weizhong, Fengchi                                                                  | MAS<br>FMA<br>BI<br>EMG           | 11 | NA | yes ;<br>physician<br>examining<br>the<br>patients<br>and<br>carrying |

|                               |                                                                                                                                                      |               |     | ±11.7<br>1             |                                      |                                                  |         |                                                                                                                                                                                           |                                                           |    |    | the<br>measure<br>ments |
|-------------------------------|------------------------------------------------------------------------------------------------------------------------------------------------------|---------------|-----|------------------------|--------------------------------------|--------------------------------------------------|---------|-------------------------------------------------------------------------------------------------------------------------------------------------------------------------------------------|-----------------------------------------------------------|----|----|-------------------------|
| Zheng<br>2018 <sup>[50]</sup> | A clinical study on acupuncture in combination with routine rehabilitation therapy for early pain recovery of post - stroke shoulder - hand syndrome | RCT           | 178 | 45 -<br>70             | Motor<br>functi<br>on<br>proble<br>m | 7 days -<br>3<br>months                          | 1 month | Jianyu, Jianliao,<br>Jianzhen, Jianneiling,<br>Quchi, Shousanli, Hegu,<br>Waiguan                                                                                                         | Clinical<br>effective<br>rate<br>VAS<br>FMA<br>FCA<br>QOL | NA | NA | NA                      |
| Zhong<br>2002 <sup>[8]</sup>  | Effects of acupuncture and balance facilitation of muscular tension on the early rehabilitation of patients with stroke and hemiplegia               | RCT           | 96  | NA                     | Balan<br>ce<br>disord<br>er          | 26 - 28<br>days                                  | 4 weeks | Tianfu, Cize, Shaohai,<br>Quze, Hongzhong,<br>Ximen, Neiguan, Yuji,<br>Shenmen, Tongli,<br>Huantiao, Futu,<br>Fengshi, Zusanli,<br>Yanglingquan,<br>Weizhong, Chengshan,<br>Jiexi, Kunlun | FMA<br>ADL                                                | NA | NA | NA                      |
| Zhou<br>2013 <sup>[33]</sup>  | Clinical research on post - stroke dysphagia treated with nape acupuncture and rehabilitation training                                               | Quasi-<br>RCT | 80  | ^<br>57±8<br>*<br>58±7 | Dysph<br>agia                        | ^<br>10.5±3.<br>8 days<br>*<br>15.1±7.<br>7 days | 4weeks  | Fengchi, Yiming,<br>Gongxue, Zhiqiang,<br>Tunyan, Lianquan,<br>exteriorJinjin,<br>exteriorYuye                                                                                            | WDT<br>SSA<br>VFSS                                        | NA | NA | NA                      |

|                            |                                                                                                                                                                          |     |    |                                                       |                                     |                                            |         |                                                                                             |                                                                                                                        |    |         |    |
|----------------------------|--------------------------------------------------------------------------------------------------------------------------------------------------------------------------|-----|----|-------------------------------------------------------|-------------------------------------|--------------------------------------------|---------|---------------------------------------------------------------------------------------------|------------------------------------------------------------------------------------------------------------------------|----|---------|----|
| Zhu 2014 <sup>[51]</sup>   | Clinical efficacy and sEMG analysis of a new traditional Chinese medicine therapy in the treatment of spasticity following apoplectic hemiparalysis                      | RCT | 60 | 40 - 80<br>^<br>63.17<br>±9.50<br>*<br>65.53<br>±8.64 | Motor function problem              | ^<br>7.86±6.62 days<br>*<br>8.46±5.14 days | 4 weeks | Shaoyao Gancao Decoction: Shaoyao, Gancao                                                   | Modified Ashworth Scale<br>Composite spasticity scale<br>Fugl - Meyer assessment scale<br>Barthel Index<br>IEMG<br>RMS | NA | 1 month | NA |
| Zhang 2020 <sup>[52]</sup> | Clinical effect of traditional Chinese medicine acupuncture and moxibustion combined with rehabilitation training in the treatment of hemiplegia after cerebral apoplexy | RCT | 60 | ^<br>63.89<br>±13.2<br>5<br>*<br>64.15<br>±13.4<br>7  | Motor function problem (Dependency) | NA                                         | 4 weeks | Jianliao, Binao, Liangqiu, Fengshi, Tianjing, Xuehai, Yanglingquan, Yinlingquan, Sanyinjiao | NIHSS<br>MMT<br>FMA<br>ADL<br>WHOQOL - BREF                                                                            | NA | NA      | NA |

|                           |                                                                                                                                                                                                                                                                                                                                    |     |    |                                                          |                                        |                                                                            |             |                                                                                                                                                               |                                                 |    |    |    |
|---------------------------|------------------------------------------------------------------------------------------------------------------------------------------------------------------------------------------------------------------------------------------------------------------------------------------------------------------------------------|-----|----|----------------------------------------------------------|----------------------------------------|----------------------------------------------------------------------------|-------------|---------------------------------------------------------------------------------------------------------------------------------------------------------------|-------------------------------------------------|----|----|----|
| Teng 2019 <sup>[21]</sup> | Effect of Peiyuan Xiaoshuan Jieyu prescription and brain protein hydrolysate on the levels of monoamine neurotransmitters in cerebrospinal fluid and serum 5 - hydroxytryptamine , brain - derived neurotrophic factor and apolipoprotein A1 in post - stroke depression patients with kidney deficiency and liver stagnation type | RCT | 94 | $\wedge$ 62.4<br>$\pm$ 5.8<br>*<br>63.1 $\pm$<br>5.6     | Depre<br>ssion                         | $\wedge$ 8.7<br>$\pm$ 3.8<br>months<br>* 9.1<br>$\pm$ 3.5mo<br>nths        | 12week<br>s | Peiyuanxiaoshuanjieyu<br>Decoction: Huangqi,<br>Baishu, Tianma,<br>Gouqizi, Shudihuang,<br>Baishao, Suanzaoren,<br>Fuling, Zhimu, Xiangfu,<br>Chaihu, Yujin   | TCM<br>HAMD                                     | NA | NA | NA |
| Yan 2019 <sup>[6]</sup>   | Effect of western medicine combined with Chaihu plus Longgu Muli decoction in the treatment of patients with post - stroke depression                                                                                                                                                                                              | RCT | 68 | $\wedge$ 60.40<br>$\pm$ 3.42<br>*<br>60.22<br>$\pm$ 3.37 | Depre<br>ssion<br>(Depe<br>ndenc<br>y) | $\wedge$ 35.04 $\pm$ 3<br>.82<br>days<br>*<br>34.85 $\pm$ 3<br>.76<br>days | 2<br>months | Chaihujialonggumuli<br>decoction: Muli,<br>Huangqi, Longgu,<br>Dangcen, Chaihu,<br>Guizhi, Fuling,<br>Xiangfu, Zhibanxia,<br>Zhizi, Dahuang,<br>Gancao, Dazao | TCM<br>HAMD<br>NIHSS<br>Barthel<br>index<br>ADL | NA | NA | NA |

|                            |                                                                                                                                                               |     |     |                                                     |                             |                                                                 |         |                                                                                                                                                |                                                           |                       |    |    |
|----------------------------|---------------------------------------------------------------------------------------------------------------------------------------------------------------|-----|-----|-----------------------------------------------------|-----------------------------|-----------------------------------------------------------------|---------|------------------------------------------------------------------------------------------------------------------------------------------------|-----------------------------------------------------------|-----------------------|----|----|
| Fu 2019 <sup>[24]</sup>    | Effect of Acupuncture plus Medication on Electroencephalogram and the Levels of Serum NE, NSE, IL - 6 and TNF - $\alpha$ in Post - stroke Depression Patients | RCT | 96  | 62 $\pm$ 8                                          | Depression                  | <sup>^</sup> 6.13 $\pm$ 1.12 months<br>* 5.94 $\pm$ 1.07 months | 4 weeks | Baihui, Shuigou, Yintang, Neiguan, Sanyinjiao                                                                                                  | HAMD<br>Electroencephalography                            | NA                    | NA | NA |
| Ye 2020 <sup>[7]</sup>     | Clinical Study on Tongluo Ditan Tang Combined with Rehabilitation Training for Shoulder - Hand Syndrome After Stroke                                          | RCT | 95  | <sup>^</sup> 58.89 $\pm$ 9.66<br>* 59.71 $\pm$ 9.38 | Motor function (dependency) | <sup>^</sup> 34.67 $\pm$ 12.50 days<br>* 33.18 $\pm$ 13.21 days | 4 weeks | Tongluoditan Decoction: Huangqi, Baishao, Yanhusuo, Banxia, Fuling, Guizhi, Chuanxiong, Yujin, Qianghuo, Tiannanxing, Jiangcan, Dilong, Gancao | SHS<br>TCM<br>Clinical effective rate<br>FMA<br>VAS<br>BI | NA                    | NA | NA |
| Jiang 2020 <sup>[53]</sup> | Clinical Study of Dysphasia After Cerebral Stroke Mainly Treated with Three Tongue Needle Therapy                                                             | RCT | 130 | <sup>^</sup> 60 $\pm$ 10<br>* 60 $\pm$ 9            | Dysphasia                   | <sup>^</sup> 16.46 $\pm$ 9.06 days<br>* 18.97 $\pm$ 8.09 days   | 4 weeks | upperLianquan                                                                                                                                  | HAMA<br>HAMD<br>sEMG                                      | <sup>^</sup> 3<br>* 7 | NA | NA |

|                           |                                                                                                                                |     |     |                                |                         |                                         |         |                                                                                                                       |                                               |    |    |    |
|---------------------------|--------------------------------------------------------------------------------------------------------------------------------|-----|-----|--------------------------------|-------------------------|-----------------------------------------|---------|-----------------------------------------------------------------------------------------------------------------------|-----------------------------------------------|----|----|----|
| Li 2019a <sup>[15]</sup>  | The therapeutic Effect of Acupuncture Combined with rehabilitation Training on Shoulder - hand Syndrome after Stroke: 55 Cases | RCT | 110 | ^ 43 - 74<br>* 45 - 73         | Motor function problem  | * 17 - 56 days<br>^ 19 - 58 days        | 1 month | Jianyu, Jianliao, Quchi, Waiguan, Hegu                                                                                | VAS<br>FMA<br>SHSS<br>Clinical effective rate | NA | NA | NA |
| Wang 2020 <sup>[4]</sup>  | Clinical Observation of Gualou Guizhi Tang for Lower Limb Spasm After Stroke and Its Effect on Motor Function of Lower Limbs   | RCT | 203 | ^ 66.04 ±7.38<br>* 65.26 ±7.45 | Motor Function          | ^ 36.52±9.37 days<br>* 35.41±10.16 days | 4 weeks | Gualouguizhi Decoction: Gualougen, Guizhi, Shengjiang, Baishao, Dazao, Gancao                                         | TCM<br>CSI<br>FMA<br>BI                       | 0  | NA | NA |
| Wang 2017 <sup>[3]</sup>  | Clinical Study on Treatment of Depression After Stroke with Combination of Chinese and Western Medicine                        | RCT | 76  | ^ 59.1±3.4<br>* 58.6±2.9       | Depression (Dependency) | ^ 4.1±1.7 months<br>* 3.9±1.9 months    | 4 weeks | Shuganyishentongluo Decoction: Huangqi, Chaihu, Zhike, Shichangpu, Baishu, Yujin, Fuling, Danggui, Suanzaoren, Gancao | HAMD<br>ADL<br>Clinical effective rate        | 0  | NA | NA |
| Wang 2016a <sup>[2]</sup> | Clinical efficacy of qi - tonifying and stasis - eliminating therapy in treatment of ischemic stroke patients in               | RCT | 125 | ^ 61.17 ±7.45<br>*             | Dependency              | >= 14days                               | 4 weeks | Qi-tonifying and stasis-eliminating decoction: Huangqi, Dilong, Chishao, Danggui,                                     | NIHSS<br>BI<br>TCM                            | 0  | NA | NA |

|                            |                                                                                                                                                                                                        |           |     |                                            |            |                                                      |           |                                                                                                                                                                  |                                |   |    |    |
|----------------------------|--------------------------------------------------------------------------------------------------------------------------------------------------------------------------------------------------------|-----------|-----|--------------------------------------------|------------|------------------------------------------------------|-----------|------------------------------------------------------------------------------------------------------------------------------------------------------------------|--------------------------------|---|----|----|
|                            | recovery period and its influence on levels of hs-CRP, Fg and HCY                                                                                                                                      |           |     | 62.25<br>±7.28                             |            |                                                      |           | Fangfeng, Chuanxiong, Shuizhi, Quanxie                                                                                                                           |                                |   |    |    |
| Han 2018 <sup>[22]</sup>   | Chaihu plus Longgu Muli Decoction combined with Fluoxetine in the Treatment of Post Stroke Depression (Ganyu Tanrao) Randomized Parallel Control Study                                                 | Quasi-RCT | 94  | ^<br>59.71<br>±5.29<br>*<br>59.69<br>±5.28 | Depression | ^<br>9.24±4.83<br>month<br>*<br>9.21±4.82<br>month   | 4 weeks   | Chaihu plus Longgu Muli decoction: Muli, Longgu, Danggui, Huangqi, Dangshen, Chaihu, Guizhi, Yujin, Dilong, Dazao, Banxia, Fuling, Gancao                        | HAMD<br>MESSS<br>GQOLI-74      | 0 | NA | NA |
| Jia 2017a <sup>[54]</sup>  | The effect of Chinese drug for tonify qi and activate the blood on dyskinesia at recovery period after ischemic stroke with syndrome of qi deficiency and blood stasis and its effect on S100β and Hcy | RCT       | 140 | ^<br>64.90<br>±5.34<br>*<br>64.72<br>±5.30 |            | ^<br>38.10±6.38<br>days<br>* 38.19<br>± 6.41<br>days | 8 weeks   | modified Buyanghuanwu Decoction: Huangqi, Dangcan, Chuanniuxi, Dilong, Sangjisheng, Jixueteng, Guizhi, Danggui, Chishao, Chuanxiong, Duzhong, Shenjincao, Gancao | TCM<br>FMA<br>BI<br>Berg score | 0 | NA | NA |
| Xiang 2016 <sup>[32]</sup> | Therapeutic Observation of Low - frequency Electrical Stimulation plus Acupuncture for Deglutition Disorders                                                                                           | RCT       | 76  | ^<br>53±8<br>*<br>54±8                     | Dysphagia  | ^<br>21.14±4.38<br>days<br>*                         | 5.7 weeks | Neiguan, Shuigou, Sanyinjiao, Fengchi, Wangu, Yifeng                                                                                                             | WDT<br>Clinical effective rate | 0 | NA | NA |

|                          |                                                                                                                                                                                                    |     |     |                                            |  |                                                      |         |                                                                              |                                                |            |    |    |
|--------------------------|----------------------------------------------------------------------------------------------------------------------------------------------------------------------------------------------------|-----|-----|--------------------------------------------|--|------------------------------------------------------|---------|------------------------------------------------------------------------------|------------------------------------------------|------------|----|----|
|                          | After Cerebral Stroke                                                                                                                                                                              |     |     |                                            |  | 23.66±5.01 days                                      |         |                                                                              |                                                |            |    |    |
| Xu 2014 <sup>[55]</sup>  | Efficacy assessment of treating post - stroke shoulder - hand syndrome patients of yin deficiency yang hyperactivity with blood stasis stagnation collaterals syndrome by yishen tongluo decoction | RCT | 60  | ^<br>63.15<br>±8.51<br>*<br>64.23<br>±7.66 |  | ^<br>32.21±7.16<br>days<br>* 31.18<br>± 7.85<br>days | 4 weeks | Yishenjiejing decoction: Duzhong, Tianma, Sanqi, Shanyurou, Quanxie, Baishao | Clinical effective rate<br>NIHSS<br>TCM<br>FMA | 0          | NA | NA |
| Wan 2013 <sup>[56]</sup> | Post - stroke shoulder - hand syndrome treated with acupuncture and rehabilitation: a randomized controlled trial                                                                                  | RCT | 120 | ^<br>60±6<br>*<br>63±6                     |  | ^<br>38.4±9.0<br>days<br>* 33.0 ±<br>9.4<br>days     | 4 weeks | Taiyuan, Zusanli, Xuanzhong, Waiguan, Shousanli, Quchi, Jianpi               | FMA<br>VRS<br>NIHSS                            | 0          | NA | NA |
| Xu 2016 <sup>[57]</sup>  | Clinical Observation of Jin's Three - needle Acupuncture plus Rehabilitation for Post - stroke Spastic Hemiplegia                                                                                  | RCT | 76  | ^<br>60±10<br>*<br>65±6                    |  | ^<br>50.39±2.52<br>days<br>*<br>47.75±               | 4 weeks | Niesanzhen, Jiquan, Chize, Neiguan, Shuqi, Yinlingquan, Sanjinjiao           | NDS<br>FMA<br>ADL<br>BI<br>FCA<br>FIM<br>CFE   | ^ 2<br>* 3 | NA | NA |



|                           |                                                                                                    |           |    |                                                      |                        |                                             |           |                                                                                  |                    |   |    |    |
|---------------------------|----------------------------------------------------------------------------------------------------|-----------|----|------------------------------------------------------|------------------------|---------------------------------------------|-----------|----------------------------------------------------------------------------------|--------------------|---|----|----|
|                           |                                                                                                    |           |    |                                                      |                        | 22.63 days                                  |           |                                                                                  |                    |   |    |    |
| Chen 2016 <sup>[58]</sup> | Efficacy Study of Acupuncture and Moxibustion on Dysphagia after Stroke                            | RCT       | 60 | ^<br>61.63<br>±10.8<br>7<br>*<br>60.90<br>±10.5<br>3 |                        | ^ 47.68 days<br>* 41.63 days                | 4 weeks   | Fengchi, Wangu, Tianzhu, Lianquan, interior Daying, Jinjin, Yuye                 | WDT<br>PRO         | 0 | NA | NA |
| Tang 2016 <sup>[1]</sup>  | Analysis of five Buyanghuanwu decoction combined with western medicine treatment of stroke sequela | Quasi-RCT | 80 | ^<br>63.34<br>±2.26<br>*<br>63.91<br>±2.58           | Motor function problem | ^ 5.67±0.32 months<br>*<br>5.61±0.35 months | 4.3 weeks | Buyanghuanwu Decoction: Huangqi, Chuanxiong, Dangguiwei, Taoren, Dilong, Honghua | NIHSS<br>FMA<br>BI | 0 | NA | NA |

### List of included studies' references

1. Tang D, Tang Y. Analysis of five Buyanghuanwu decoction combined with western medicine treatment of stroke sequela. *Cardiovascular Disease Journal of Integrated Traditional Chinese and Western Medicine*. 2016;14:139-140.
2. Wang C. Clinical efficacy of qi-tonifying and stasis-eliminating therapy in treatment of ischemic stroke patients in recovery period and its influence on levels of hs-CRP, Fg and HCY. *Journal of Clinical Medicine in Practice*. 2016;20:28-31.
3. Wang Y. Clinical Study on Treatment of Depression After Stroke with Combination of Chinese and Western Medicine. *Acta Chinese Medicine*. 2017;32:1519-1522.
4. Wang J, Xing Y and Jiang S. Clinical observation of Gualou Guizhi Tang for lower limb spasm after stroke and its effect on motor function of lower limbs. *Journal of New Chinese Medicine*. 2020;52:28-31.
5. Xu B, Zhou WY and Zhang SJ. Observation on effect of wuling capsule in treating poststroke depression. *Chinese journal of integrated traditional and western medicine*. 2007;27:640-642.
6. Yan Q, Yang G. Effect of western medicine combined with Chaihu plus Longgu Muli decoction in the treatment of patients with post-stroke depression. *Clinical Research and Practice*. 2019;36:152-154.
7. Ye S, Yang G, Jin J, et al. Clinical Study on Tongluo Ditan Tang Combined with Rehabilitation Training for Shoulder-Hand Syndrome After Stroke. *Journal of New Chinese Medicine*. 2020;52:70-72.
8. Zhong CM, Liu QF, Jin HY, et al. Effects of acupuncture and balance facilitation of muscular tension on the early rehabilitation of patients with stroke and hemiplegia. *Chinese Journal of Clinical Rehabilitation*. 2002;6:3612-3613.
9. Li W, Ceng YH and Yu XG. Observation on therapeutic effect of acupuncture combined with medicine on mild cognition disorders in patients with post-stroke. *Chinese acupuncture & moxibustion*. 2012;32:3-7.
10. Wang HQ, Hou M, Bao CL, et al. Effects of acupuncture treatment on lower limb spasticity in patients following hemorrhagic stroke: A pilot study. *Eur Neurol*. 2019;81:5-12.
11. Wei HT, Peng T, Yang D, et al. Clinical study of acupuncture combined with rehabilitation training in the treatment of dysphagia after stroke. *Journal emergency in traditional chinese medicine*. 2015;24:1808-1810.
12. Xia JH, Xu CE, Xia WG, et al. Clinical observation of acupuncture plus rehabilitation training for post-stroke depression. *Shanghai journal of*

- acupuncture and moxibustion*. 2015;34:724-727.
13. Xia W, Zheng C, Xia J, et al. Post-stroke dysphagia treated with acupuncture of meridian differentiation: A randomized controlled trial. *Chinese acupuncture & moxibustion*. 2016;36:673-678.
  14. Cheng XK, Wang ZM, Sun L, et al. Post-stroke hand dysfunction treated with acupuncture at zhongzhu (Te 3) and waiguan (Te 5). *Chinese acupuncture & moxibustion*. 2011;31:117-120.
  15. Li Y, Li L. The therapeutic Effect of acupuncture combined with rehabilitation training on shoulder-hand syndrome after Stroke: 55 cases. *Chinese Journal of Ethnomedicine and Ethnopharmacy*. 2019;28:96-98.
  16. Wu XL, Mi ZP, Wang HS, et al. Effect of acupuncture combined physical training and relearning on stroke rehabilitation: A multi-center randomized controlled clinical study. *Chinese journal of integrated traditional and Western medicine*. 2015;35:549-554.
  17. Zhang NX, Liu GZ, Huang TQ, et al. Effect of heat-reinforcing needling combined with rehabilitation training on the motor function of ischemic stroke patients. *Acupuncture research*. 2009;34:406-409.
  18. Zhao JG, Cao CH, Liu CZ, et al. Effect of acupuncture treatment on spastic states of stroke patients. *J Neurol Sci*. 2009;276:143-147.
  19. Fu JL, Zhao YW and Sun XJ. Efficacy and safety of deanxit combined with wuling capsule in treating post-stroke depression: A randomized controlled trial. *Journal of Chinese integrative medicine*. 2008;6:258-261.
  20. Li TG. 85 cases of depression due to stroke treated with therapy of integrated traditional chinese and western medicine. *Henan traditional chinese medicine*. 2015;35:535-536.
  21. Teng X, Gao L and Zhou B. Effect of Peiyuan Xiaoshuan Jieyu prescription and brain protein hydrolysate on the levels of monoamine neurotransmitters in cerebrospinal fluid and serum 5-hydroxytryptamine, brain-derived neurotrophic factor and apolipoprotein A1 in post-stroke depression patients with kidney deficiency and liver stagnation type. *Hebei J TCM*. 2019;41:397-401.
  22. Yan Q, Yang G. Effect of western medicine combined with Chaihu plus Longgu Muli decoction in the treatment of patients with post-stroke depression. *Clinical Research and Practice*. 2019;36:152-154.
  23. Chen A, Gao Y, Wang G, et al. Effect of early acupuncture intervention on post-stroke depression: A randomized controlled trial. *Chinese acupuncture & moxibustion*. 2018;38:1141-1144.
  24. Fu W. Effect of Acupuncture plus Medication on Electroencephalogram and the Levels of Serum NE, NSE, IL-6 and TNF- $\alpha$  in Post-stroke Depression Patients. *Shanghai J Acu-mox*. 2019;38:1214-1218.

25. Nie RR, Huang CH. Post-stroke depression treated with acupuncture and moxibustion: An evaluation of therapeutic effect and safety. *Chinese acupuncture & moxibustion*. 2013;33:490-494.
26. Wu JR, Yang JC and Nie J. 30 case of depression of post stroke with treatment kaiyu ditan decoction. *Journal of jiangxi university of traditional chinese medicine*. 2015;27:50-54.
27. Yang J, Wang F and Xiao W-H. Clinical observation on the treatment with acupuncture combined with medicine on 33 cases with depression after apoplexy. *Journal emergency in traditional chinese medicine*. 2015;24:1227-1228.
28. Fan CF, Jiang HY and Wu LZ. Clinical observations on acupuncture treatment of post-stroke dysphagia. *Journal of Acupuncture and Tuina Science*. 2007;5:297-300.
29. Li XZ, Gu BL, Zhou H, et al. Influence of nape acupuncture therapy on swallowing function of patients with cerebral infarction. *Medical Journal of Chinese People's Liberation Army* 2019;44:322-326.
30. Lu M, Meng L and Peng J. Therapeutic effects of neuromuscular electrical stimulation and electroacupuncture for dysphagia post stroke. *Chinese journal of rehabilitation medicine*. 2010;25:135-138.
31. Wang ZJ, Zhang Y, Ji QC, et al. The study of acupuncture and swallowing training in the treatment of dysphagia after stroke. *China and foreign medical treatment*. 2016;36:174-176.
32. Xiang L, Liu X, Xu Z. Therapeutic Observation of Low-frequency Electrical Stimulation plus Acupuncture for Deglutition Disorders After Cerebral Stroke. *Shanghai J Acu-mox*. 2016;35:1417-1419.
33. Zhou XM, Li XZ and Gu BL. Clinical research on post-stroke dysphagia treated with nape acupuncture and rehabilitation training. *Chinese acupuncture & moxibustion*. 2013;33:587-590.
34. Chu J, Liu X, Chen F, et al. Effects of gao's neck acupuncture on swallowing function and quality of life in patients with post-stroke pseudobulbar palsy:A randomized controlled trial. *Chinese acupuncture & moxibustion*. 2017;37:691-695.
35. Bai YL, Li L, Hu YS, et al. Prospective, randomized controlled trial of physiotherapy and acupuncture on motor function and daily activities in patients with ischemic stroke. *J Altern Complement Med*. 2013;19(8):684-689.
36. Xia W, Zheng C, Zhu S, et al. Combination of feeding-swallowing training and acupuncture:An effective rehabilitation method for dysphagia post strok. *Acta Med Univ Sci Technol Huazhong*. 2010;39:614-619.
37. Guan CX, Guo GH and Yu L. Therapeutic effect of acupuncture plus deglutition training on patients with dysphagia caused by brainstem

- stroke. *Journal of medical forum*. 2009;30:19-23.
38. Jia C, Zhang H, Ni G, et al. Spasmodic hemiplegia after stroke treated with scalp acupuncture, music therapy and rehabilitation: A randomized controlled trial. *Chinese acupuncture & moxibustion*. 2017;37:1271-1275.
39. Li Z, Liu F, Luo B, et al. Clinical observation on auricular magnetotherapy for convalescent stroke patients with depression. *Chinese acupuncture & moxibustion*. 2018;38:942-947.
40. Ma FX, Cao GP and Li WL. Post-stroke dysphagia treated with acupoint injection combined with neural electrical stimulation. *Chinese acupuncture & moxibustion*. 2014;34:1169-1173.
41. Magnusson M, Johansson K and Johansson BB. Sensory stimulation promotes normalization of postural control after stroke. *Stroke*. 1994;25:1176-1180.
42. Wang M, Liu S, Peng Z, et al. Effect of Tui Na on upper limb spasticity after stroke: a randomized clinical trial. *Ann Clin Transl Neurol*. 2019;6(4):778-787.
43. Wei YX, Zhao X and Zhang BC. Synergistic effect of moxibustion and rehabilitation training in functional recovery of post-stroke spastic hemiplegia. *Complement Ther Med*. 2016;26:55-60.
44. Wong AM, Su TY, Tang FT, et al. Clinical trial of electrical acupuncture on hemiplegic stroke patients. *Am J Phys Med Rehabil*. 1999;78(2):117-122.
45. Xia W, Zheng C, Zhu S, et al. Does the addition of specific acupuncture to standard swallowing training improve outcomes in patients with dysphagia after stroke? a randomized controlled trial. *Clin Rehabil*. 2016;30(3):237-246.
46. Yan HD, Yang N, Zhao MH, et al. Therapeutic Observation of Thunder-fire Moxibustion at Dazhui (GV14) and Shenshu (BL23) plus Cognitive Training for Mild Cognitive Impairment Due to Ischemic Cerebral Stroke. *Shanghai Journal of Acupuncture and Moxibustion*. 2016;12:1410-1413.
47. Zeng YH, Bao Y, Zhu M, et al. Clinical study on acupuncture for ambulation disturbance in subacute stage of cerebral stroke. *Shanghai journal of acupuncture and moxibustion*. 2016;35:262-265.
48. Zhang HY, Li PF. Observation on efficacy of acupuncture combined with rehabilitation training for post-stroke balance disorders. *World Journal of Acupuncture - Moxibustion*. 2014;24:25-29.
49. Zhang Y, Al-Aref R, Fu H, et al. Neuronavigation-Assisted Aspiration and Electro-Acupuncture for Hypertensive Putaminal Hemorrhage: A

- Suitable Technique on Hemiplegia Rehabilitation. *Turk Neurosurg.* 2017;27(4):500-508.
50. Zheng J, Wu Q, Wang L, et al. A clinical study on acupuncture in combination with routine rehabilitation therapy for early pain recovery of post-stroke shoulder-hand syndrome. *Exp Ther Med.* 2018;15:2049-2053.
51. Zhu W, Zheng G, Gu Y, et al. Clinical efficacy and sEMG analysis of a new traditional Chinese medicine therapy in the treatment of spasticity following apoplectic hemiparalysis. *Acta Neurol Belg.* 2014;114(2):125-129.
52. Zhang J, Zheng W. Clinical effect of traditional Chinese medicine acupuncture and moxibustion combined with rehabilitation training in the treatment of hemiplegia after cerebral apoplexy. *China Modern Medicine.* 2020;27:155-158.
53. Jiang Y, Lin L, You Y, et al. Clinical Study of Dysphasia After Cerebral Stroke Mainly Treated with Three Tongue Needle Therapy. *Shanghai J Acu-mox.* 2020;39:530-535.
54. Jia L, Zhang J, Wang G, et al. The effect of Chinese drug for tonify qi and activate the blood on dyskinesia at recovery period after ischemic stroke with syndrome of qi deficiency and blood stasis and its effect on S100 $\beta$  and Hcy. *Modern Journal of Integrated Traditional Chinese and Western Medicine.* 2017;32:3551-3554.
55. Xu X, Ye S. Efficacy assessment of treating post-stroke shoulder-hand syndrome patients of yin deficiency yang hyperactivity with blood stasis stagnation collaterals syndrome by yishen tongluo decoction. *Chinese journal of integrated traditional and Western medicine.* 2014;34:1069-1073.
56. Wan WR, Wang TL, Cheng SL, et al. Post-stroke shoulder-hand syndrome treated with acupuncture and rehabilitation: a randomized controlled trial. *Chinese acupuncture & moxibustion.* 2013;33:970-974.
57. Xu S, Gu J. Clinical Observation of Jin's Three-needle Acupuncture plus Rehabilitation for Post-stroke Spastic Hemiplegia. *Shanghai J Acu-mox.* 2016;35:153-156.
58. Chen L, Zhang G. Efficacy Study of Acupuncture and Moxibustion on Dysphagia after Stroke. *Journal of Emergency in Traditional Chinese Medicine.* 2016;25:1111-1113.
